# Supplementary material
Source: PubMed Central journal article supplement (PMC4681857)
Supplement: ismej201581x1.pdf [file ismej201581x1.pdf]

## **Supplementary Information**

### **Contents**

- 1. Supplementary Table 1**
- 2. Supplementary Table 2**
- 3. Supplementary Table 3**
- 4. Supplementary Table 4**
- 5. Supplementary Table 5**
- 6. Supplementary Table 6**
- 7. Supplementary Table 7**
- 8. Supplementary Table 8**
- 9. Supplementary Table 9**
- 10. Supplementary Table 10**
- 11. Supplementary Table 11**
- 12. Supplementary Figure S1**
- 13. Supplementary Figure S2**
- 14. Supplementary Figure S3**
- 15. Supplementary Figure S4**
- 16. Supplementary Figure S5**
- 17. Supplementary Figure S6**
- 18. Supplementary Figure S7**
- 19. Supplementary Figure S8**
- 20. Supplementary Figure S9**

**Supplementary Table 1. Sampling details**

| ELSC Site/Vent                                             | Sample                | Sample type                   | Date(DD/MM/YYYY)  | Latitude/Longitude                        | Depth (m)   | Filter size (µm) | No. of reads       | Reference            |
|------------------------------------------------------------|-----------------------|-------------------------------|-------------------|-------------------------------------------|-------------|------------------|--------------------|----------------------|
| <b>M<br/>A<br/>R<br/>I<br/>N<br/>E<br/>R<br/>/<br/>MA3</b> | TN236-J2440-2         | Near bottom background        | 20/06/2009        | S 22 10.818293<br>W 176 36.086423         | 1915        | 0.8              | x                  | (Sheik et al., 2014) |
|                                                            | TN236-J2440-6         | Rising Plume                  | 20/06/2009        | S 22 10.818293<br>W 176 36.086423         | 1915        | 0.8              | x                  | (Sheik et al., 2014) |
|                                                            | TN236-J2440-7         | Rising Plume                  | 20/06/2009        | S 22 10.818293<br>W 176 36.086423         | 1915        | 0.8              | x                  | (Sheik et al., 2014) |
|                                                            | TN236-J2440-10        | Rising Plume                  | 20/06/2009        | S 22 10.818293<br>W 176 36.086423         | 1910        | 0.8              | x                  | (Sheik et al., 2014) |
|                                                            | TN236-J2440-11        | Rising Plume                  | 20/06/2009        | S 22 10.818293<br>W 176 36.086423         | 1910        | 0.8              | x                  | (Sheik et al., 2014) |
|                                                            | TN236-J2440-14        | Rising Plume                  | 20/06/2009        | S 22 10.818293<br>W 176 36.086423         | 1900        | 0.8              | x                  | (Sheik et al., 2014) |
|                                                            | TN236-J2440-15        | Rising Plume                  | 20/06/2009        | S 22 10.818293<br>W 176 36.086423         | 1900        | 0.8              | x                  | (Sheik et al., 2014) |
|                                                            | <b>TN236-J2440-18</b> | <b>Rising Plume</b>           | <b>20/06/2009</b> | <b>S 22 10.818293<br/>W 176 36.086423</b> | <b>1890</b> | <b>0.8</b>       | <b>185,135,248</b> | <b>THIS STUDY</b>    |
|                                                            | TN236-J2440-19        | Rising Plume                  | 20/06/2009        | S 22 10.818293<br>W 176 36.086423         | 1890        | 0.8              | x                  | (Sheik et al., 2014) |
|                                                            | TN236-J2440-21        | Above plume background        | 20/06/2009        | S 22 10.818293<br>W 176 36.086423         | ~1300       | 0.8              | x                  | (Sheik et al., 2014) |
| TN236-J2440-24                                             | Blank                 | 20/06/2009                    | x                 | x                                         | 0.8         | x                |                    |                      |
| <b>A<br/>B<br/>E<br/>/<br/>A1</b>                          | <b>TN236-J2449-2</b>  | <b>Near bottom background</b> | <b>04/07/2009</b> | <b>S 22 45.677706<br/>W 176 11.369574</b> | <b>2155</b> | <b>0.8</b>       | <b>169,488,288</b> | <b>THIS STUDY</b>    |
|                                                            | TN236-J2449-4         | Rising Plume                  | 04/07/2009        | S 22 45.677706<br>W 176 11.369574         | 2155        | 0.8              | x                  | (Sheik et al., 2014) |
|                                                            | TN236-J2449-5         | Rising Plume                  | 04/07/2009        | S 22 45.677706<br>W 176 11.369574         | 2155        | 0.8              | x                  | (Sheik et al., 2014) |
|                                                            | TN236-J2449-10        | Rising Plume                  | 04/07/2009        | S 22 45.677706<br>W 176 11.369574         | 2150        | 0.8              | x                  | (Sheik et al., 2014) |
|                                                            | TN236-J2449-14        | Rising Plume                  | 04/07/2009        | S 22 45.677706<br>W 176 11.369574         | 2150        | 0.8              | x                  | (Sheik et al., 2014) |
|                                                            | TN236-J2449-21        | Above plume background        | 04/07/2009        | S 22 45.677706<br>W 176 11.369574         | ~1300       | 0.8              | x                  | (Sheik et al., 2014) |
|                                                            | TN236-J2449-24        | Blank                         | 04/07/2009        | x                                         | x           | 0.8              | x                  |                      |
| <b>A<br/>B<br/>E<br/>/<br/>A1</b>                          | TN236-J2435-3         | Near bottom background        | 13/06/2009        | S 20 45.672883<br>W 176 11.434418         | 2159        | 0.8              | x                  | (Sheik et al., 2014) |
|                                                            | TN236-J2435-4         | Rising Plume                  | 13/06/2009        | S 20 45.672883<br>W 176 11.434418         | 2159        | 0.8              | x                  | (Sheik et al., 2014) |
|                                                            | TN236-J2435-5         | Rising Plume                  | 13/06/2009        | S 20 45.672883<br>W 176 11.434418         | 2159        | 0.8              | x                  | (Sheik et al., 2014) |
|                                                            | TN236-J2435-8         | Rising Plume                  | 13/06/2009        | S 20 45.672883<br>W 176 11.434418         | 2149        | 0.8              | x                  | (Sheik et al., 2014) |
|                                                            | TN236-J2435-9         | Rising Plume                  | 13/06/2009        | S 20 45.672883<br>W 176 11.434418         | 2149        | 0.8              | x                  | (Sheik et al., 2014) |
|                                                            | TN236-J2435-12        | Rising Plume                  | 13/06/2009        | S 20 45.672883<br>W 176 11.434418         | 2129        | 0.8              | x                  | (Sheik et al., 2014) |
|                                                            | TN236-J2435-13        | Rising Plume                  | 13/06/2009        | S 20 45.672883<br>W 176 11.434418         | 2129        | 0.8              | x                  | (Sheik et al., 2014) |
|                                                            | TN236-J2435-16        | Rising Plume                  | 13/06/2009        | S 20 45.672883<br>W 176 11.434418         | 2069        | 0.8              | x                  | (Sheik et al., 2014) |
|                                                            | TN236-J2435-17        | Rising Plume                  | 13/06/2009        | S 20 45.672883<br>W 176 11.434418         | 2069        | 0.8              | x                  | (Sheik et al., 2014) |
|                                                            | TN236-J2435-20        | Above plume background        | 13/06/2009        | S 20 45.672883<br>W 176 11.434418         | ~1300       | 0.8              | x                  | (Sheik et al., 2014) |
| TN236-J2435-24                                             | Blank                 | 13/06/2009                    | x                 | x                                         | 0.8         | x                |                    |                      |

|                                                           |                       |                        |                   |                                           |             |            |                    |                      |
|-----------------------------------------------------------|-----------------------|------------------------|-------------------|-------------------------------------------|-------------|------------|--------------------|----------------------|
| T<br>A<br>H<br>I<br><br>M<br>O<br>A<br>N<br>A<br>/<br>SP2 | TN236-J2450-2         | Near bottom background | 05/07/2009        | S 20 40.894100<br>W 176 10.940463         | 2235        | 0.8        | x                  | (Sheik et al., 2014) |
|                                                           | TN236-J2450-4         | Rising Plume           | 05/07/2009        | S 20 40.894100<br>W 176 10.940463         | 2235        | 0.8        | x                  | (Sheik et al., 2014) |
|                                                           | TN236-J2450-5         | Rising Plume           | 05/07/2009        | S 20 40.894100<br>W 176 10.940463         | 2235        | 0.8        | x                  | (Sheik et al., 2014) |
|                                                           | <b>TN236-J2450-9</b>  | <b>Rising Plume</b>    | <b>05/07/2009</b> | <b>S 20 40.894100<br/>W 176 10.940463</b> | <b>2229</b> | <b>0.8</b> | <b>186,087,990</b> | <b>THIS STUDY</b>    |
|                                                           | TN236-J2450-10        | Rising Plume           | 05/07/2009        | S 20 40.894100<br>W 176 10.940463         | 2229        | 0.8        | x                  | (Sheik et al., 2014) |
|                                                           | TN236-J2450-14        | Rising Plume           | 05/07/2009        | S 20 40.894100<br>W 176 10.940463         | 2229        | 0.8        | x                  | (Sheik et al., 2014) |
|                                                           | TN236-J2450-20        | Above plume background | 05/07/2009        | S 20 40.894100<br>W 176 10.940463         | ~1300       | 0.8        | x                  | (Sheik et al., 2014) |
|                                                           | TN236-J2450-24        | Blank                  | 05/07/2009        | x                                         | x           | 0.8        | x                  |                      |
| K<br>I<br>L<br>O<br><br>M<br>O<br>A<br>N<br>A<br>/<br>KM1 | TN236-J2436-2         | Near bottom background | 15/06/2009        | S 20 3.229502 W<br>176 8.015363           | 2665        | 0.8        | x                  | (Sheik et al., 2014) |
|                                                           | TN236-J2436-4         | Rising Plume           | 15/06/2009        | S 20 3.229502 W<br>176 8.015363           | 2665        | 0.8        | x                  | (Sheik et al., 2014) |
|                                                           | TN236-J2436-5         | Rising Plume           | 15/06/2009        | S 20 3.229502 W<br>176 8.015363           | 2665        | 0.8        | x                  | (Sheik et al., 2014) |
|                                                           | TN236-J2436-8         | Rising Plume           | 15/06/2009        | S 20 3.229502 W<br>176 8.015363           | 2655        | 0.8        | x                  | (Sheik et al., 2014) |
|                                                           | TN236-J2436-9         | Rising Plume           | 15/06/2009        | S 20 3.229502 W<br>176 8.015363           | 2655        | 0.8        | x                  | (Sheik et al., 2014) |
|                                                           | TN236-J2436-12        | Rising Plume           | 15/06/2009        | S 20 3.229502 W<br>176 8.015363           | 2635        | 0.8        | x                  | (Sheik et al., 2014) |
|                                                           | TN236-J2436-13        | Rising Plume           | 15/06/2009        | S 20 3.229502 W<br>176 8.015363           | 2635        | 0.8        | x                  | (Sheik et al., 2014) |
|                                                           | <b>TN236-J2436-16</b> | <b>Rising Plume</b>    | <b>15/06/2009</b> | <b>S 20 3.229502 W<br/>176 8.015363</b>   | <b>2605</b> | <b>0.8</b> | <b>174,530,426</b> | <b>THIS STUDY</b>    |
|                                                           | TN236-J2436-17        | Rising Plume           | 15/06/2009        | S 20 3.229502 W<br>176 8.015363           | 2605        | 0.8        | x                  | (Sheik et al., 2014) |
|                                                           | TN236-J2436-20        | Above plume background | 15/06/2009        | S 20 3.229502 W<br>176 8.015363           | ~1300       | 0.8        | x                  | (Sheik et al., 2014) |
|                                                           | TN236-J2436-24        | Blank                  | 15/06/2009        | x                                         | x           | 0.8        | x                  |                      |
| T<br>U<br>I<br><br>M<br>A<br>L<br>I<br>L<br>A<br>/<br>TMI | TN236-J2447-2         | Near bottom background | 01/07/2009        | S 21 59.401181<br>W 176 34.124651         | 1929        | 0.8        | x                  | (Sheik et al., 2014) |
|                                                           | TN236-J2447-4         | Rising Plume           | 01/07/2009        | S 21 59.401181<br>W 176 34.124651         | 1929        | 0.8        | x                  | (Sheik et al., 2014) |
|                                                           | TN236-J2447-5         | Rising Plume           | 01/07/2009        | S 21 59.401181<br>W 176 34.124651         | 1929        | 0.8        | x                  | (Sheik et al., 2014) |
|                                                           | TN236-J2447-9         | Rising Plume           | 01/07/2009        | S 21 59.401181<br>W 176 34.124651         | 1919        | 0.8        | x                  | (Sheik et al., 2014) |
|                                                           | <b>TN236-J2447-10</b> | <b>Rising Plume</b>    | <b>01/07/2009</b> | <b>S 21 59.401181<br/>W 176 34.124651</b> | <b>1919</b> | <b>0.8</b> | <b>187,067,650</b> | <b>THIS STUDY</b>    |
|                                                           | TN236-J2447-14        | Rising Plume           | 01/07/2009        | S 21 59.401181<br>W 176 34.124651         | 1899        | 0.8        | x                  | (Sheik et al., 2014) |
|                                                           | TN236-J2447-18        | Rising Plume           | 01/07/2009        | S 21 59.401181<br>W 176 34.124651         | 1899        | 0.8        | x                  | (Sheik et al., 2014) |
|                                                           | TN236-J2447-20        | Above plume background | 01/07/2009        | S 21 59.401181<br>W 176 34.124651         | ~1300       | 0.8        | x                  | (Sheik et al., 2014) |
| TN236-J2447-24                                            | Blank                 | 01/07/2009             | x                 | x                                         | 0.8         | x          |                    |                      |
| T<br>U<br>I<br><br>M<br>A<br>L<br>I<br><br>T              | TN236-J2442-2         | Near bottom background | 23/06/2009        | S 21 59.274547<br>W 176 34.060503         | 1928        | 0.8        | x                  | (Sheik et al., 2014) |
|                                                           | TN236-J2442-5         | Rising Plume           | 23/06/2009        | S 21 59.274547<br>W 176 34.060503         | 1928        | 0.8        | x                  | (Sheik et al., 2014) |
|                                                           | TN236-J2442-9         | Above plume background | 23/06/2009        | S 21 59.274547<br>W 176 34.060503         | ~1300       | 0.8        | x                  | (Sheik et al., 2014) |
|                                                           | TN236-J2442-20        | Above plume background | 23/06/2009        | S 21 59.274547<br>W 176 34.060503         | ~1000       | 0.8        | x                  | (Sheik et al., 2014) |

|                                                           |                         |                                |                   |                                           |              |            |                         |                      |
|-----------------------------------------------------------|-------------------------|--------------------------------|-------------------|-------------------------------------------|--------------|------------|-------------------------|----------------------|
| L<br>A<br>/TMS<br>I                                       | TN236-J2442-24          | Blank                          | 23/06/2009        | x                                         | x            | 0.8        | x                       |                      |
|                                                           |                         |                                |                   |                                           |              |            |                         |                      |
| T<br>A<br>H<br>I<br><br>M<br>O<br>A<br>N<br>A<br>/<br>SP1 | TN236-J2445-2           | Near bottom background         | 29/06/2009        | S 20 40.927843<br>W 176 11.001806         | 2230         | 0.8        | x                       | (Sheik et al., 2014) |
|                                                           | TN236-J2445-4           | Rising Plume                   | 29/06/2009        | S 20 40.927843<br>W 176 11.001806         | 2230         | 0.8        | x                       | (Sheik et al., 2014) |
|                                                           | TN236-J2445-10          | Rising Plume                   | 29/06/2009        | S 20 40.927843<br>W 176 11.001806         | 2220         | 0.8        | x                       | (Sheik et al., 2014) |
|                                                           | TN236-J2445-13          | Rising Plume                   | 29/06/2009        | S 20 40.927843<br>W 176 11.001806         | 2220         | 0.8        | x                       | (Sheik et al., 2014) |
|                                                           | <b>TN236-J2445-20.2</b> | <b>Above plume background</b>  | <b>29/06/2009</b> | <b>S 20 40.927843<br/>W 176 11.001806</b> | <b>~1300</b> | <b>0.2</b> | <b>181,482<br/>,188</b> | <b>THIS STUDY</b>    |
|                                                           | TN236-J2445-20.8        | Above plume background         | 29/06/2009        | S 20 40.927843<br>W 176 11.001806         | ~1000        | 0.8        | x                       | (Sheik et al., 2014) |
|                                                           | TN236-J2445-24          | Blank                          | 29/06/2009        | x                                         | x            | 0.8        | x                       |                      |
|                                                           |                         |                                |                   |                                           |              |            |                         |                      |
| K<br>I<br>L<br>O<br><br>M<br>O<br>A<br>N<br>A<br>/<br>KM4 | TN235-J2424-7           | Rising Plume                   | 22/05/2009        | S 20 3.234200 W<br>176 8.008000           | 2639         | 0.8        | x                       | (Sheik et al., 2014) |
|                                                           | <b>TN235-J2424-8</b>    | <b>Rising Plume</b>            | <b>22/05/2009</b> | <b>S 20 3.234200 W<br/>176 8.008000</b>   | <b>2639</b>  | <b>0.8</b> | <b>118,751<br/>,402</b> | <b>THIS STUDY</b>    |
|                                                           | TN235-J2424-11          | Rising Plume                   | 22/05/2009        | S 20 3.234200 W<br>176 8.008000           | 2629         | 0.8        | x                       | (Sheik et al., 2014) |
|                                                           | TN235-J2424-12          | Rising Plume                   | 22/05/2009        | S 20 3.234200 W<br>176 8.008000           | 2629         | 0.8        | x                       | (Sheik et al., 2014) |
|                                                           | TN235-J2424-16          | Rising Plume                   | 22/05/2009        | S 20 3.234200 W<br>176 8.008000           | 2599         | 0.8        | x                       | (Sheik et al., 2014) |
|                                                           | TN235-J2424-19          | Rising Plume                   | 22/05/2009        | S 20 3.234200 W<br>176 8.008000           | 2599         | 0.8        | x                       | (Sheik et al., 2014) |
|                                                           | <b>TN235-J2424-20</b>   | <b>Rising Plume</b>            | <b>22/05/2009</b> | <b>S 20 3.234200 W<br/>176 8.008000</b>   | <b>2439</b>  | <b>0.8</b> | <b>157,276<br/>,514</b> | <b>THIS STUDY</b>    |
|                                                           | TN235-J2424-22          | Above plume background         | 22/05/2009        | S 20 3.234200 W<br>176 8.008000           | x            | 0.8        | x                       | (Sheik et al., 2014) |
|                                                           |                         |                                |                   |                                           |              |            |                         |                      |
| A<br>B<br>E<br>/<br>A1                                    | <b>TN235-J2426-7</b>    | <b>Rising Plume</b>            | <b>25/05/2009</b> | <b>S 20 45.672883<br/>W 176 11.434418</b> | <b>2159</b>  | <b>0.8</b> | <b>181,094<br/>,744</b> | <b>THIS STUDY</b>    |
|                                                           | TN235-J2426-12          | Rising Plume                   | 25/05/2009        | S 20 45.672883<br>W 176 11.434418         | 2149         | 0.8        | x                       | (Sheik et al., 2014) |
|                                                           | TN235-J2426-16          | Rising Plume                   | 25/05/2009        | S 20 45.672883<br>W 176 11.434418         | 2119         | 0.8        | x                       | (Sheik et al., 2014) |
|                                                           | <b>TN235-J2426-20</b>   | <b>Rising Plume</b>            | <b>25/05/2009</b> | <b>S 20 45.672883<br/>W 176 11.434418</b> | <b>1959</b>  | <b>0.8</b> | <b>168,325<br/>,584</b> | <b>THIS STUDY</b>    |
|                                                           | TN235-J2426-24          | Blank                          | 25/05/2009        | x                                         | x            | 0.8        | x                       |                      |
|                                                           |                         |                                |                   |                                           |              |            |                         |                      |
| A<br>B<br>E<br>/<br>A1                                    | TN235-J2427-2           | Near bottom background         | 27/05/2009        | S 20 45.672883<br>W 176 11.434418         | 2155         | 0.8        | x                       | (Sheik et al., 2014) |
|                                                           | TN235-J2427-7           | Rising Plume                   | 27/05/2009        | S 20 45.672883<br>W 176 11.434418         | 2159         | 0.8        | x                       | (Sheik et al., 2014) |
|                                                           | TN235-J2427-8           | Rising Plume                   | 27/05/2009        | S 20 45.672883<br>W 176 11.434418         | 2159         | 0.8        | x                       | (Sheik et al., 2014) |
|                                                           | TN235-J2427-19          | Rising Plume                   | 27/05/2009        | S 20 45.672883<br>W 176 11.434418         | 2159         | 0.8        | x                       | (Sheik et al., 2014) |
|                                                           | TN235-J2427-20          | Rising Plume                   | 27/05/2009        | S 20 45.672883<br>W 176 11.434418         | 2159         | 0.8        | x                       | (Sheik et al., 2014) |
|                                                           |                         |                                |                   |                                           |              |            |                         |                      |
| K<br>I<br>L<br>O<br><br>M                                 | TN236-CTD-KM-IP1        | Neutrally buoyant plume        | 13/06/2009        | S 20 3.246489 W<br>176 8.011308           | 2305         | 0.2        | x                       | (Sheik et al., 2014) |
|                                                           | <b>TN236-CTD-KM-IP2</b> | <b>Neutrally buoyant plume</b> | <b>13/06/2009</b> | <b>S 20 3.246489 W<br/>176 8.011308</b>   | <b>2315</b>  | <b>0.2</b> | <b>188,964<br/>,668</b> | <b>THIS STUDY</b>    |

|                                               |                          |                               |                   |                                        |             |            |                    |                      |
|-----------------------------------------------|--------------------------|-------------------------------|-------------------|----------------------------------------|-------------|------------|--------------------|----------------------|
| O<br>A<br>N<br>A                              | TN236-CTD-KM-BP1         | Below Plume background        | 13/06/2009        | S 20 3.246489 W 176 8.011308           | 2400        | 0.2        | x                  | (Sheik et al., 2014) |
|                                               | TN236-CTD-KM-BP2         | Below Plume background        | 13/06/2009        | S 20 3.246489 W 176 8.011308           | 2350        | 0.2        | x                  | (Sheik et al., 2014) |
|                                               |                          |                               |                   |                                        |             |            |                    |                      |
| T<br>U<br>I<br><br>M<br>A<br>L<br>I<br>L<br>A | TN236-CTD-Tui-IP1        | Neutrally buoyant plume       | 20/06/2009        | S 21.98790 W 176.56768                 | 1675        | 0.2        | x                  | (Sheik et al., 2014) |
|                                               | TN236-CTD-Tui-IP2        | Neutrally buoyant plume       | 20/06/2009        | S 21.98790 W 176.56768                 | 1650        | 0.2        | x                  | (Sheik et al., 2014) |
|                                               | TN236-CTD-Tui-BP1        | Below Plume background        | 20/06/2009        | S 21.98790 W 176.56768                 | 1750        | 0.2        | x                  | (Sheik et al., 2014) |
|                                               |                          |                               |                   |                                        |             |            |                    |                      |
| Tahi Moana/ID                                 | TN236-CTD-TM-IP1         | Neutrally buoyant plume       | 05/07/2009        | S 20 40.3905 W 176 10.8435             | 2050        | 0.2        | x                  | (Sheik et al., 2014) |
|                                               |                          |                               |                   |                                        |             |            |                    |                      |
| M<br>A<br>R<br>I<br>N<br>E<br>R               | TN236-CTD-Mar-IP1        | Neutrally buoyant plume       | 19/06/2009        | S 20 10.8035165 W 176 36.074496        | 1740        | 0.2        | x                  | (Sheik et al., 2014) |
|                                               | TN236-CTD-Mar-IP2        | Neutrally buoyant plume       | 19/06/2009        | S 20 10.8035165 W 176 36.074496        | 1725        | 0.2        | x                  | (Sheik et al., 2014) |
|                                               | <b>TN236-CTD-Mar-BP1</b> | <b>Below Plume background</b> | <b>19/06/2009</b> | <b>S 20 10.8035165 W 176 36.074496</b> | <b>1785</b> | <b>0.2</b> | <b>154,673,072</b> | <b>THIS STUDY</b>    |
|                                               | TN236-CTD-Mar-BP2        | Below Plume background        | 19/06/2009        | S 20 10.8035165 W 176 36.074496        | 1780        | 0.2        | x                  | (Sheik et al., 2014) |
|                                               | TN236-CTD-Mar-BP1        | Above Plume background        | 19/06/2009        | S 20 10.8035165 W 176 36.074496        | 1680        | 0.2        | x                  | (Sheik et al., 2014) |
|                                               | TN236-CTD-Mar-BP2        | Above Plume background        | 19/06/2009        | S 20 10.8035165 W 176 36.074496        | 1600        | 0.2        | x                  | (Sheik et al., 2014) |

**Supplementary Table S2. Endmember fluid concentrations for model.**

| Property                                  | ABE A1 vent <sup>a</sup> | Mariner MA1 vent <sup>a</sup> | Kilo Moana KM1 vent <sup>a</sup> | Seawater          |
|-------------------------------------------|--------------------------|-------------------------------|----------------------------------|-------------------|
| T (°C)                                    | 309                      | 334                           | 333                              | 2                 |
| pH <sup>b</sup>                           | 4.3                      | 2.5                           | 3.6                              | 8                 |
| O <sub>2</sub> , aqueous                  | 0                        | 0                             | 0                                | 0.15 <sup>c</sup> |
| NH <sub>4</sub> <sup>+</sup> <sup>d</sup> | 0.23                     | 0.23                          | 0.23                             | 0                 |
| N <sub>2</sub> , aqueous                  | 0.48 <sup>e</sup>        | 0.48 <sup>e</sup>             | 0.48                             | 0.58 <sup>e</sup> |
| NO <sub>3</sub> <sup>-</sup>              | 0                        | 0                             | 0                                | 0.035             |
| NO <sub>2</sub> <sup>-</sup>              | 0                        | 0                             | 0                                | 0.001             |
| H <sub>2</sub> , aqueous <sup>f</sup>     | 0.20                     | 0.20                          | 0.51                             | 0.0000004         |
| SO <sub>4</sub> <sup>2-</sup>             | 0                        | 0                             | 0                                | 28                |
| H <sub>2</sub> S, aqueous                 | 3.6                      | 6.2                           | 6                                | 0                 |
| ∑CO <sub>2</sub> , aqueous                | 8                        | 32                            | 8.1                              | 1.8               |
| CH <sub>4</sub> , aqueous <sup>f</sup>    | 0.04                     | 0.04                          | 0.06                             | 0                 |
| Cl <sup>-</sup>                           | 534                      | 624                           | 581                              | 540               |
| Na <sup>+</sup>                           | 430                      | 458                           | 486                              | 464               |
| Ca <sup>2+</sup>                          | 39                       | 45                            | 35                               | 10.2              |
| Mg <sup>2+</sup>                          | 0                        | 0                             | 0                                | 52.2              |
| K <sup>+</sup>                            | 25                       | 36                            | 17                               | 10.1              |
| SiO <sub>2</sub> , aqueous                | 17                       | 16                            | 19                               | 0.17              |
| Fe                                        | 0.27                     | 11.3                          | 2.5                              | 0                 |
| Mn <sup>2+</sup>                          | 0.47                     | 5.94                          | 0.51                             | 0                 |
| Cu <sup>+</sup> <sup>g</sup>              | 0.03                     | 0.03                          | 0.03                             | 0                 |
| Zn <sup>2+</sup> <sup>g</sup>             | 0.07                     | 0.07                          | 0.07                             | 0                 |
| Ba <sup>2+</sup> <sup>g</sup>             | 0.05                     | 0.05                          | 0.05                             | 0                 |

All concentrations in mmol/kg vent fluid.

- (a) Vent chemistry data (Mottl et al., 2011).
- (b) *In situ* pH based on 25 °C measurement.
- (c) WOCE section P06 background dissolved O<sub>2</sub>, NO<sub>3</sub><sup>-</sup>, and NO<sub>2</sub><sup>-</sup> (Talley 2007).
- (d) Predicted to exist as NH<sub>3</sub> in vent fluid; , assumed to be due to 17% conversion of seawater dissolved N<sub>2</sub> (Brandes et al., 1998).

- (e) Seawater dissolved N<sub>2</sub> (Weiss and Craig 1973); vent fluid dissolved N<sub>2</sub> assumed to be 83% of seawater concentration (Brandes et al., 1998).
- (f) Dissolved gases (Seewald et al., 2005).
- (g) Based on EPR 21° N (Von Damm et al., 1985) for lack of more relevant data.

**Supplementary Table 3.** Assembly statistics

| <b>Velvet+MetaVetvet+Minimus</b>                                  | <b>IDBA-UD</b>                                                                                                                                  |
|-------------------------------------------------------------------|-------------------------------------------------------------------------------------------------------------------------------------------------|
| Total Sequences: 640793                                           | Total Sequences: 1091773                                                                                                                        |
| Total Bases: 841,239,120                                          | Total Bases: 1,511,701,270                                                                                                                      |
| Total Bases in sequences greater than 4000:<br>143,260,994        | Total Bases in sequences greater than 4000:<br>553,583,049                                                                                      |
| Longest Sequence Length: 818,219                                  | Longest Sequence Length: 830,465                                                                                                                |
| Shortest Sequence Length: 501                                     | Shortest Sequence Length: 91                                                                                                                    |
| Mean Length: 1313 bp                                              | Mean Length: 1385 bp                                                                                                                            |
| Mean Length after setting the 4000 base limit:<br>6886 bp         | Mean Length after setting the 4000 base limit:<br>8909 bp                                                                                       |
| Number of Sequences with Length greater<br>than 4000 bases: 20804 | Number of Sequences with Length greater<br>than 4000 bases: 62135                                                                               |
| Nucleotide Distribution after setting the 4000<br>base limit:     | Nucleotide Distribution after setting the 4000<br>base limit:                                                                                   |
| A : 27.6824 %                                                     | A : 28.9150 %                                                                                                                                   |
| T : 27.6417 %                                                     | T : 28.4189 %                                                                                                                                   |
| G : 22.2372 %                                                     | G : 21.2481 %                                                                                                                                   |
| C : 22.3155 %                                                     | C : 21.4015 %                                                                                                                                   |
| N : 0.1233 %                                                      | N : 0.0165 %                                                                                                                                    |
|                                                                   | Percentage of reads assembled by site:<br>Kilo Moana: 34.60 %<br>Abe: 33.91 %<br>Mariner: 53.75 %<br>Tahi Moana: 43.96 %<br>Tui Malila: 43.48 % |
| Sequence Length Range: No. of Contigs                             | Sequence Length Range: No. of Contigs                                                                                                           |
| 1-2000: 554653                                                    | 1-2000: 909021                                                                                                                                  |
| 2001-4000: 65336                                                  | 2001-4000: 120617                                                                                                                               |
| 4001-6000: 13164                                                  | 4001-6000: 31034                                                                                                                                |
| 6001-8000: 4049                                                   | 6001-8000: 12248                                                                                                                                |
| 8001-10000: 1619                                                  | 8001-10000: 6256                                                                                                                                |
| 10001-12000: 713                                                  | 10001-12000: 3417                                                                                                                               |
| 12001-14000: 367                                                  | 12001-14000: 2203                                                                                                                               |
| 14001-16000: 229                                                  | 14001-16000: 1565                                                                                                                               |
| 16001-18000: 144                                                  | 16001-18000: 1055                                                                                                                               |
| 18001-20000: 95                                                   | 18001-20000: 773                                                                                                                                |
| 20001-22000: 63                                                   | 20001-22000: 581                                                                                                                                |
| 22001-24000: 45                                                   | 22001-24000: 440                                                                                                                                |
| 24001-26000: 51                                                   | 24001-26000: 355                                                                                                                                |
| 26001-28000: 29                                                   | 26001-28000: 284                                                                                                                                |



|                    |                     |
|--------------------|---------------------|
| 28001-30000: 24    | 28001-30000: 216    |
| 30001-32000: 16    | 30001-32000: 212    |
| 32001-34000: 19    | 32001-34000: 182    |
| 34001-36000: 13    | 34001-36000: 130    |
| 36001-38000: 13    | 36001-38000: 127    |
| 38001-40000: 14    | 38001-40000: 90     |
| 40001-42000: 16    | 40001-42000: 105    |
| 42001-44000: 6     | 42001-44000: 86     |
| 44001-46000: 13    | 44001-46000: 60     |
| 46001-48000: 11    | 46001-48000: 52     |
| 48001-50000: 3     | 48001-50000: 60     |
| 50001-52000: 6     | 50001-52000: 47     |
| 52001-54000: 4     | 52001-54000: 38     |
| 54001-56000: 9     | 54001-56000: 38     |
| 56001-58000: 7     | 56001-58000: 38     |
| 58001-60000: 3     | 58001-60000: 25     |
| 60001-62000: 6     | 60001-62000: 23     |
| 62001-64000: 2     | 62001-64000: 30     |
| 64001-66000: 5     | 64001-66000: 19     |
| 66001-68000: 4     | 66001-68000: 16     |
| 68001-70000: 3     | 68001-70000: 19     |
| 70001-72000: 1     | 70001-72000: 16     |
| 72001-74000: 1     | 72001-74000: 13     |
| 74001-76000: 1     | 74001-76000: 20     |
| 76001-78000: 1     | 76001-78000: 14     |
| 78001-80000: 2     | 78001-80000: 13     |
| 80001-82000: 7     | 80001-82000: 9      |
| 82001-84000: 1     | 82001-84000: 13     |
| 88001-90000: 3     | 84001-86000: 9      |
| 90001-92000: 1     | 86001-88000: 9      |
| 92001-94000: 1     | 88001-90000: 14     |
| 96001-98000: 1     | 90001-92000: 7      |
| 98001-100000: 2    | 92001-94000: 7      |
| 100001-1000000: 17 | 94001-96000: 7      |
|                    | 96001-98000: 5      |
|                    | 98001-100000: 5     |
|                    | 100001-1000000: 150 |

**Supplementary Table 4.** Details of identified ORFs

| <b>Assembly</b>  | <b>Protein coding genes</b> | <b>rRNA genes</b> | <b>tRNA genes</b> | <b>COG clusters</b> | <b>Pfam clusters</b> |
|------------------|-----------------------------|-------------------|-------------------|---------------------|----------------------|
| <b>KiloMoana</b> | 401957                      | 294               | 4218              | 4456                | 13850                |
| <b>Abe</b>       | 664114                      | 188               | 8039              | 4443                | 14587                |
| <b>Mariner</b>   | 202932                      | 186               | 2322              | 4203                | 12115                |
| <b>TahiMoana</b> | 267200                      | 181               | 2933              | 4336                | 13038                |
| <b>TuiMalila</b> | 141590                      | 94                | 1614              | 3771                | 10753                |

**Supplementary Table 5.** Details of identified archaeal, bacterial and eukarya bins

| Bin name | Organism/Group                                                                                                | No. of Contigs | Total size(bp) | %GC   | Estimated no. of genomes | Percent completion of bins |
|----------|---------------------------------------------------------------------------------------------------------------|----------------|----------------|-------|--------------------------|----------------------------|
| Lau1     | Bacteria;Candidate Division TM7                                                                               | 5              | 909,913        | 43.52 | 1                        | 97.2                       |
| Lau2     | Bacteria;Cyanobacteria/Melainabacteria;MLE1-12                                                                | 360            | 4,104,129      | 49.49 | 1                        | 34.4                       |
| Lau3     | Bacteria;Chloroflexi;SAR202 clade                                                                             | 821            | 6,029,363      | 56.89 | 1                        | 90.6                       |
| Lau4     | Bacteria;Proteobacteria;Gammaproteobacteria;Alteromonadales; Alteromonadaceae;Alteromonas                     | 661            | 9,888,618      | 43.86 | 2                        | 212.5                      |
| Lau5     | Bacteria;Proteobacteria;Gammaproteobacteria;Alteromonadales; Alteromonadaceae;Marinobacter                    | 195            | 9,438,787      | 56.12 | 2                        | 196.9                      |
| Lau6     | Archaea;Euryarchaeota;Thermoplasmata;Thermoplasmatales;Marine Group II (Group C)                              | 303            | 7,737,129      | 44.58 | 4                        | 381.3                      |
| Lau7     | Bacteria;Planctomycetes;Phycisphaerae;Phycisphaerales;Phycisphaerae;JL-ETNP-F27                               | 1335           | 11,146,757     | 45.04 | 5                        | 475.0                      |
| Lau8     | Eukaryota;Opisthokonta;Metazoa;Mollusca;Bivalvia;Mytiloidea;Bathymodiolus tangaroa                            | 9584           | 54,022,390     | 33.91 | 1                        | 21.9                       |
| Lau9     | Bacteria;Proteobacteria;Gammaproteobacteria;Oceanospirillales; ZD0405 (ARCTIC96BD-19)                         | 291            | 2,388,907      | 39.34 | 1                        | 68.8                       |
| Lau10    | Bacteria;Proteobacteria;Gammaproteobacteria;Oceanospirillales; SUP05 Clade                                    | 2159           | 14,020,866     | 38.01 | 8                        | 712.5                      |
| Lau11    | Bacteria;Proteobacteria;Gammaproteobacteria;Pseudomonadales; Moraxellaceae;Acinetobacter (LIKELY CONTAMINANT) | 696            | 8,573,787      | 39.02 | 2                        | 150.0                      |
| Lau12    | Bacteria;Chloroflexi;Anaerolineae;Anaerolineales;Anaerolineaceae                                              | 111            | 682,424        | 42.15 | 1                        | 15.6                       |
| Lau14    | Bacteria;Proteobacteria;Alphaproteobacteria;SAR11 clade                                                       | 4284           | 30,724,625     | 30.06 | 26                       | 2600.0                     |
| Lau15    | Bacteria;Proteobacteria;Epsilonproteobacteria;Campylobacterales;Helicobacteraceae;Sulfurimonas                | 96             | 677,211        | 34.51 | 1                        | 18.8                       |
| Lau16    | Bacteria;Proteobacteria;Gammaproteobacteria;Oceanospirillales; SAR86 clade                                    | 448            | 4,266,187      | 37.37 | 3                        | 237.5                      |
| Lau17    | Bacteria; Nitrospinae; Nitrospina; Nitrospinales; Nitrospinae                                                 | 1713           | 13,893,733     | 39.39 | 6                        | 525.0                      |
| Lau19    | Archaea;Thaumarchaeota;Marine Group I                                                                         | 2096           | 15,151,636     | 33.46 | 10                       | 918.8                      |
| Lau20    | Bacteria;Proteobacteria;Deltaproteobacteria;SAR324 clade (Marine Group B)                                     | 1435           | 14,645,818     | 42.12 | 8                        | 753.1                      |
| Lau21    | Bacteria;Poribacteria                                                                                         | 1247           | 19,585,039     | 44.23 | 2                        | 171.9                      |
| Lau22    | Bacteria;Bacteroidetes;Flavobacteria;Flavobacteriales;Flavobacteriaceae;Mesonia                               | 146            | 2,464,964      | 34.89 | 1                        | 31.3                       |
| Lau23    | Bacteria;Bacteroidetes;Flavobacteria;Flavobacteriales;Flavobacteriaceae;Marixanthomonas                       | 14             | 3,250,025      | 40.28 | 2                        | 118.8                      |
| Lau24    | Bacteria;Bacteroidetes;Flavobacteria;Flavobacteriales;Flavobacteriaceae;Marixanthomonas                       | 131            | 1,056,646      | 40.83 | 1                        | 12.5                       |
| Lau26    | Bacteria;Proteobacteria;Alphaproteobacteria;Rhodospirillales;Rhodospirillaceae;Thalassospira                  | 66             | 555,626        | 52.41 | 1                        | 12.5                       |
| Lau27    | Bacteria;Cyanobacteria;SHA-109                                                                                | 318            | 2,573,937      | 54.10 | 1                        | 12.5                       |
| Lau28    | Bacteria;Proteobacteria;Gammaproteobacteria;Alteromonadales; Alteromonadaceae                                 | 399            | 3,845,565      | 45.21 | 1                        | 21.9                       |
| Lau29    | Bacteria;Proteobacteria;Gammaproteobacteria;Alteromonadales; Alteromonadaceae                                 | 87             | 556,445        | 50.32 | 1                        | 6.3                        |
| Lau30    | Bacteria;Proteobacteria;Alphaproteobacteria;Rhodospirillales                                                  | 1134           | 10,534,609     | 45.25 | 2                        | 196.9                      |
| Lau31    | Bacteria;Bacteroidetes;Unclassified                                                                           | 453            | 4,462,640      | 38.23 | 1                        | 100.0                      |
| Lau32    | Bacteria;Bacteroidetes;Unclassified                                                                           | 78             | 722,333        | 40.67 | 1                        | 0.0                        |
| Lau33    | Bacteria;Bacteroidetes;Flavobacteria;Flavobacteriales;Flavobacteriaceae                                       | 59             | 373,613        | 40.53 | 1                        | 6.3                        |
| Lau34    | Archaea;Euryarchaeota;Halobacteria;Halobacteriales;Deep Sea Hydrothermal Vent Gp 6(DHVEG-6)                   | 293            | 2,770,233      | 52.56 | 1                        | 90.6                       |

|        |                                                                                                |      |            |       |    |        |
|--------|------------------------------------------------------------------------------------------------|------|------------|-------|----|--------|
| Lau35  | Bacteria;Planctomycetes;Pla3 lineage                                                           | 787  | 6,055,579  | 57.39 | 1  | 84.4   |
| Lau36  | Bacteria;Planctomycetes;Pla3 lineage                                                           | 401  | 4,733,687  | 60.40 | 5  | 415.6  |
| Lau40  | Bacteria;Acidobacteria;Acidobacteria;BPC102                                                    | 112  | 728,843    | 53.76 | 1  | 6.3    |
| Lau41  | Bacteria; Nitrospinae; Nitrospina; Nitrospinales; Nitrospinaceae                               | 2066 | 16,427,353 | 46.90 | 5  | 462.5  |
| Lau42  | Bacteria;Bacteroidetes;Flavobacteria;Flavobacteriales;NS9 marine group                         | 274  | 5,807,840  | 43.39 | 3  | 231.3  |
| Lau44  | Bacteria;Nitrospirae                                                                           | 408  | 4,397,644  | 52.21 | 3  | 234.4  |
| Lau45  | Bacteria;Gemmatimonadetes;Gemmatimonadetes;BD2-11 group                                        | 378  | 2,772,136  | 54.30 | 1  | 53.1   |
| Lau46  | Bacteria;Proteobacteria;Alphaproteobacteria;Rhodobacterales;Hyphomonadaceae                    | 111  | 943,398    | 55.70 | 1  | 0.0    |
| Lau47  | Bacteria;Deferribacteres;Deferribacteres;Deferribacterales;SAR406 clade (Marine Group A)       | 688  | 13,711,201 | 45.88 | 7  | 656.3  |
| Lau51  | Bacteria;Proteobacteria;Gammaproteobacteria;Oceanospirillales; SUP05 Clade                     | 272  | 3,134,417  | 36.38 | 1  | 6.3    |
| Lau52  | Bacteria;Bacteroidetes;Unclassified                                                            | 106  | 780,364    | 42.65 | 1  | 9.4    |
| Lau53  | Bacteria;Proteobacteria;Deltaproteobacteria;Unclassified                                       | 56   | 323,536    | 48.99 | 1  | 0.0    |
| Lau60  | Bacteria;Proteobacteria;Gammaproteobacteria;Order Incertae cedis (Tubeworm symbiont)           | 823  | 11,148,002 | 52.75 | 5  | 465.6  |
| Lau62  | Bacteria;Proteobacteria;Gammaproteobacteria;E01-9C-26 marine group                             | 1126 | 16,062,766 | 52.41 | 5  | 200.0  |
| Lau64  | Bacteria;Bacteroidetes;Unclassified                                                            | 758  | 9,477,688  | 43.38 | 2  | 143.8  |
| Lau65  | Unclassified                                                                                   | 445  | 2,679,292  | 43.14 | 2  | 6.3    |
| Lau66  | Bacteria;Bacteroidetes;Flavobacteria;Unclassified                                              | 491  | 4,091,476  | 44.27 | 1  | 262.5  |
| Lau92  | Archaea;Euryarchaeota;Thermoplasmata;Thermoplasmatales;Marine Group II (Group B)               | 272  | 3,084,605  | 58.48 | 3  | 46.9   |
| Lau93  | Archaea;Euryarchaeota;Thermoplasmata;Thermoplasmatales;Marine Group II                         | 84   | 675,085    | 55.05 | 1  | 112.5  |
| Lau94  | Bacteria;Planctomycetes;Planctomycetia;Planctomycetales;Planctomycetaceae                      | 315  | 2,328,079  | 53.02 | 2  | 0.0    |
| Lau95  | Bacteria;Proteobacteria;Gammaproteobacteria;Unclassified                                       | 37   | 223,029    | 49.01 | 1  | 87.5   |
| Lau96  | Bacteria;Planctomycetes;Planctomycetia;Planctomycetales;Planctomycetaceae                      | 383  | 3,436,646  | 48.68 | 1  | 18.8   |
| Lau98  | Bacteria;Proteobacteria;Deltaproteobacteria;Unclassified                                       | 218  | 1,804,876  | 52.32 | 1  | 0.0    |
| Lau101 | Bacteria;Proteobacteria;Unclassified                                                           | 6    | 41,648     | 56.77 | 1  | 1328.1 |
| Lau103 | Bacteria;Deferribacteres;Deferribacteres;Deferribacterales;SAR406 clade (Marine Group A)       | 4434 | 43,187,681 | 41.00 | 14 | 178.1  |
| Lau104 | Bacteria;Deferribacteres;Deferribacteres;Deferribacterales;SAR406 clade (Marine Group A)       | 443  | 3,720,913  | 38.27 | 2  | 0.0    |
| Lau112 | Bacteria;Unclassified                                                                          | 20   | 129,093    | 45.18 | 1  | 218.8  |
| Lau113 | Bacteria;Proteobacteria;Gammaproteobacteria;Methylococcales; Hyd24-01 (OPU3)                   | 312  | 5,302,821  | 42.67 | 3  | 40.6   |
| Lau114 | Bacteria;Proteobacteria;Gammaproteobacteria;Unclassified                                       | 233  | 2,023,828  | 51.56 | 1  | 0.0    |
| Lau115 | Bacteria;Proteobacteria;Gammaproteobacteria;Unclassified                                       | 20   | 149,321    | 48.72 | 1  | 418.8  |
| Lau117 | Bacteria;Unclassified                                                                          | 3    | 15,852     | 49.67 | 1  | 0.0    |
| Lau118 | Bacteria;Proteobacteria;Alphaproteobacteria;Rhodospirillales                                   | 492  | 4,917,635  | 50.47 | 2  | 137.5  |
| Lau122 | Bacteria;Proteobacteria;Gammaproteobacteria;Oceanospirillales; SUP05 Clade                     | 302  | 1,876,788  | 33.89 | 1  | 6.3    |
| Lau123 | Bacteria;Unclassified                                                                          | 269  | 1,838,828  | 55.05 | 1  | 37.5   |
| Lau125 | Archaea;Euryarchaeota;Unclassified                                                             | 65   | 415,496    | 30.15 | 1  | 37.5   |
| Lau126 | Bacteria;Unclassified                                                                          | 40   | 232,436    | 49.11 | 1  | 0.0    |
| Lau127 | Bacteria;Proteobacteria;Alphaproteobacteria;Unclassified                                       | 32   | 186,078    | 44.71 | 1  | 3.1    |
| Lau129 | Bacteria;Proteobacteria;Epsilonproteobacteria;Campylobacterales;Helicobacteraceae;Sulfurimonas | 17   | 96,262     | 35.98 | 1  | 0.0    |

|        |                                                                                                    |     |           |       |   |       |
|--------|----------------------------------------------------------------------------------------------------|-----|-----------|-------|---|-------|
| Lau143 | Bacteria;Proteobacteria;Gammaproteobacteria;Unclassified                                           | 6   | 30,876    | 34.90 | 1 | 0.0   |
| Lau158 | Bacteria;Verrucomicrobia;Unclassified                                                              | 35  | 308,256   | 38.65 | 1 | 0.0   |
| Lau159 | Bacteria;Proteobacteria;Unclassified                                                               | 9   | 80,800    | 42.17 | 1 | 0.0   |
| Lau163 | Bacteria;Proteobacteria;Gammaproteobacteria;Unclassified                                           | 32  | 215,013   | 53.70 | 1 | 3.1   |
| Lau164 | Bacteria;Verrucomicrobia;Unclassified                                                              | 10  | 73,599    | 56.43 | 1 | 0.0   |
| Lau176 | Bacteria;Proteobacteria;Gammaproteobacteria;Pseudomonadales;Pseudomonadaceae (LIKELY CONTAMINANT)  | 59  | 829,333   | 54.32 | 1 | 65.6  |
| Lau177 | Bacteria;Proteobacteria;Gammaproteobacteria;Pseudomonadales;Pseudomonadaceae (LIKELY CONTAMINANT)  | 53  | 463,345   | 59.13 | 1 | 12.5  |
| Lau178 | Bacteria;Proteobacteria;Gammaproteobacteria;Methylococcales                                        | 40  | 237,587   | 53.25 | 1 | 3.1   |
| Lau179 | Bacteria;Proteobacteria;Unclassified                                                               | 8   | 107,643   | 39.59 | 1 | 0.0   |
| Lau184 | Bacteria;Verrucomicrobia;Unclassified                                                              | 5   | 23,710    | 36.52 | 1 | 0.0   |
| Lau190 | Bacteria;Verrucomicrobia;Arctic97B-4 marine group                                                  | 417 | 2,886,548 | 58.15 | 2 | 115.6 |
| Lau197 | Bacteria;Proteobacteria;Deltaproteobacteria;Unclassified                                           | 2   | 20,751    | 44.98 | 1 | 0.0   |
| Lau198 | Bacteria;Unclassified                                                                              | 4   | 27,618    | 46.17 | 1 | 0.0   |
| Lau203 | Bacteria;Proteobacteria;Unclassified                                                               | 58  | 438,706   | 48.30 | 1 | 6.3   |
| Lau208 | Bacteria;Verrucomicrobia;Unclassified                                                              | 6   | 30,481    | 38.88 | 1 | 0.0   |
| Lau210 | Bacteria;Proteobacteria;Betaproteobacteria;Burkholderiales                                         | 5   | 31,669    | 39.17 | 1 | 0.0   |
| Lau227 | Bacteria;Aquificae;Aquificae;Aquificales;Aquificaceae                                              | 171 | 1,296,646 | 48.41 | 2 | 181.3 |
| Lau229 | Bacteria;Proteobacteria;Epsilonproteobacteria                                                      | 127 | 1,142,760 | 36.98 | 1 | 50.0  |
| Lau230 | Bacteria;Proteobacteria;Gammaproteobacteria;Salinisphaerales;Salinisphaeraceae;ZD0417 marine group | 376 | 3,589,670 | 42.05 | 3 | 243.8 |
| Lau231 | Bacteria;Unclassified                                                                              | 20  | 190,602   | 39.64 | 3 | 290.6 |
| Lau233 | Bacteria;Unclassified                                                                              | 35  | 210,608   | 37.71 | 1 | 3.1   |
| Lau236 | Bacteria;Unclassified                                                                              | 122 | 879,107   | 55.12 | 1 | 50.0  |
| Lau237 | Bacteria;Aquificae;Aquificae;Aquificales;Desulfurobacteriaceae                                     | 27  | 148,555   | 49.01 | 1 | 0.0   |
| Lau248 | Bacteria;Proteobacteria;Gammaproteobacteria;Alteromonadales;Alteromonadaceae;Alteromonas           | 1   | 4,388     | 47.47 | 1 | 0.0   |
| Lau249 | Bacteria;Unclassified                                                                              | 1   | 63,694    | 41.61 | 1 | 3.1   |
| Lau252 | Bacteria;Bacteroidetes;Flavobacteria;Flavobacteriales;Cryomorphaceae;Unclassified                  | 21  | 120,381   | 38.76 | 1 | 0.0   |
| Lau259 | Bacteria;Unclassified                                                                              | 87  | 501,503   | 42.49 | 1 | 3.1   |
| Lau265 | Bacteria;Verrucomicrobia;Unclassified                                                              | 2   | 13,130    | 43.42 | 1 | 0.0   |
| Lau269 | Bacteria;Proteobacteria;Gammaproteobacteria;Unclassified                                           | 12  | 84,379    | 46.85 | 1 | 0.0   |
| Lau331 | Archaea;Thaumarchaeota;Marine Group I                                                              | 12  | 79,139    | 40.58 | 1 | 3.1   |
| Lau371 | Bacteria;Proteobacteria;Gammaproteobacteria;Unclassified                                           | 9   | 45,561    | 41.34 | 1 | 0.0   |
| Lau374 | Bacteria;Proteobacteria;Alphaproteobacteria;Unclassified                                           | 474 | 3,950,903 | 49.99 | 1 | 31.3  |
| Lau375 | Bacteria;Proteobacteria;Deltaproteobacteria;SAR324 clade (Marine Group B)                          | 551 | 3,959,011 | 42.64 | 2 | 137.5 |
| Lau376 | Bacteria;Proteobacteria;Alphaproteobacteria;Unclassified                                           | 598 | 5,415,484 | 44.70 | 2 | 146.9 |
| Lau377 | Bacteria;Poribacteria                                                                              | 328 | 8,726,215 | 42.97 | 3 | 253.1 |
| Lau378 | Bacteria;Proteobacteria;Gammaproteobacteria;Unclassified                                           | 139 | 1,320,110 | 38.32 | 2 | 137.5 |
| Lau379 | Bacteria;Unclassified                                                                              | 17  | 108,542   | 45.11 | 1 | 3.1   |

\*Numbers higher than 100% in estimates of percent completion of bins indicate the presence of multiple species/strains in a bin that could not be separated.

**Supplementary Table 6.** Details of bins of putative extrachromosomal elements

| Bin name | Organism/Group                                                               | % of unclassified/viral genes | No. of Contigs | Total size(bp) | %GC   | No. of genomes |
|----------|------------------------------------------------------------------------------|-------------------------------|----------------|----------------|-------|----------------|
| Lau13    | Unclassified/Putative Phage                                                  | 89.43%                        | 97             | 906,225        | 32.81 | 4              |
| Lau37    | Unclassified/Putative Phage                                                  | 97.17%                        | 24             | 267,668        | 39.56 | 5              |
| Lau38    | Unclassified/Putative Phage                                                  | 97.06%                        | 11             | 110,943        | 42.79 | 4              |
| Lau39    | Unclassified/Putative Phage                                                  | 94.01%                        | 10             | 218,585        | 35.75 | 4              |
| Lau43    | Unclassified/Putative Phage                                                  | 40.91%                        | 161            | 1,268,671      | 52.21 | 5              |
| Lau49    | Unclassified/Putative Phage                                                  | 46.42%                        | 64             | 665,092        | 56.63 | 2              |
| Lau50    | Unclassified/Putative Phage                                                  | 79.11%                        | 39             | 415,853        | 35.45 | 3              |
| Lau54    | Unclassified/Putative Phage                                                  | 90.81%                        | 67             | 498,303        | 42.19 | 4              |
| Lau55    | Unclassified/Putative Phage                                                  | 90.75%                        | 136            | 958,976        | 39.62 | 5              |
| Lau56    | Unclassified/Putative Phage                                                  | 50.00%                        | 2              | 19,029         | 52.07 | 2              |
| Lau57    | Unclassified/Putative Phage                                                  | 98.81%                        | 14             | 99,492         | 38.82 | 3              |
| Lau58    | Unclassified/Putative Phage                                                  | 96.97%                        | 6              | 40,910         | 36.58 | 3              |
| Lau59    | Unclassified/Putative Phage                                                  | 97.87%                        | 13             | 60,899         | 53.25 | 4              |
| Lau61    | Unclassified/Putative Phage                                                  | 95.06%                        | 7              | 34,875         | 54.40 | 3              |
| Lau63    | Unclassified/Putative Phage                                                  | 95.48%                        | 12             | 65,347         | 56.15 | 5              |
| Lau67    | Unclassified/Putative Phage                                                  | 60.00%                        | 12             | 84,271         | 45.64 | 3              |
| Lau68    | Unclassified/Putative Phage                                                  | 86.11%                        | 14             | 118,281        | 38.27 | 4              |
| Lau69    | Unclassified/Putative Phage                                                  | 100.00%                       | 9              | 55,064         | 51.12 | 3              |
| Lau70    | Unclassified/Putative Phage                                                  | 82.86%                        | 4              | 20,305         | 53.31 | 1              |
| Lau72    | Unclassified/Putative Phage                                                  | 100.00%                       | 5              | 33,263         | 47.71 | 3              |
| Lau73    | Unclassified/Putative Phage                                                  | 96.97%                        | 8              | 51,647         | 45.93 | 4              |
| Lau74    | Unclassified/Putative Phage                                                  | 44.44%                        | 6              | 48,078         | 41.64 | 3              |
| Lau75    | Unclassified/Putative Phage                                                  | 86.67%                        | 5              | 39,146         | 42.64 | 3              |
| Lau76    | Unclassified/Putative Phage                                                  | 100.00%                       | 6              | 42,252         | 43.52 | 3              |
| Lau77    | Viruses;dsdna viruses (no rna stage);Caudovirales;Myoviridae;T4-like viruses | 81.39%                        | 56             | 823,098        | 36.81 | 3              |
| Lau78    | Unclassified/Putative Phage                                                  | 97.02%                        | 12             | 153,339        | 45.94 | 3              |
| Lau79    | Unclassified/Putative Phage                                                  | 100.00%                       | 2              | 13,172         | 48.39 | 1              |
| Lau80    | Unclassified/Putative Phage                                                  | 90.22%                        | 5              | 54,015         | 43.61 | 3              |
| Lau81    | Unclassified/Putative Phage                                                  | 97.59%                        | 14             | 111,548        | 46.40 | 3              |
| Lau82    | Unclassified/Putative Phage                                                  | 100.00%                       | 2              | 16,979         | 44.13 | 2              |
| Lau83    | Unclassified/Putative Phage                                                  | 88.89%                        | 2              | 19,354         | 41.04 | 1              |
| Lau84    | Unclassified/Putative Phage                                                  | 89.83%                        | 9              | 65,626         | 42.48 | 3              |
| Lau85    | Viruses;dsdna viruses (no rna stage);Caudovirales;Myoviridae;T4-like viruses | 80.85%                        | 59             | 633,699        | 36.06 | 4              |
| Lau86    | Unclassified/Putative Phage                                                  | 70.59%                        | 3              | 25,238         | 50.03 | 3              |
| Lau88    | Unclassified/Putative Phage                                                  | 100.00%                       | 4              | 31,494         | 47.11 | 3              |
| Lau89    | Unclassified/Putative Phage                                                  | 57.23%                        | 12             | 101,643        | 46.65 | 5              |

|        |                             |         |    |         |       |   |
|--------|-----------------------------|---------|----|---------|-------|---|
| Lau90  | Unclassified/Putative Phage | 34.78%  | 5  | 52,667  | 39.61 | 2 |
| Lau91  | Unclassified/Putative Phage | 98.08%  | 8  | 60,391  | 45.55 | 2 |
| Lau99  | Unclassified/Putative Phage | 50.00%  | 5  | 39,180  | 47.24 | 4 |
| Lau100 | Unclassified/Putative Phage | 98.46%  | 4  | 26,653  | 53.86 | 3 |
| Lau102 | Unclassified/Putative Phage | 98.00%  | 5  | 156,492 | 40.85 | 1 |
| Lau105 | Unclassified/Putative Phage | 36.84%  | 9  | 44,553  | 30.42 | 1 |
| Lau106 | Unclassified/Putative Phage | 25.00%  | 5  | 30,862  | 46.02 | 3 |
| Lau107 | Unclassified/Putative Phage | 28.57%  | 6  | 28,868  | 43.20 | 4 |
| Lau108 | Unclassified/Putative Phage | 74.07%  | 11 | 53,957  | 38.68 | 5 |
| Lau109 | Unclassified/Putative Phage | 100.00% | 3  | 15,772  | 44.46 | 2 |
| Lau110 | Unclassified/Putative Phage | 100.00% | 11 | 86,118  | 40.52 | 4 |
| Lau111 | Unclassified/Putative Phage | 58.33%  | 11 | 62,590  | 42.52 | 4 |
| Lau120 | Unclassified/Putative Phage | 88.82%  | 37 | 181,802 | 41.69 | 2 |
| Lau121 | Unclassified/Putative Phage | 94.51%  | 33 | 163,604 | 32.91 | 2 |
| Lau128 | Unclassified/Putative Phage | 100.00% | 15 | 112,930 | 56.04 | 4 |
| Lau130 | Unclassified/Putative Phage | 85.00%  | 6  | 68,113  | 38.82 | 3 |
| Lau131 | Unclassified/Putative Phage | 100.00% | 5  | 36,407  | 49.18 | 4 |
| Lau132 | Unclassified/Putative Phage | 100.00% | 7  | 69,732  | 53.05 | 4 |
| Lau133 | Unclassified/Putative Phage | 100.00% | 28 | 202,724 | 43.26 | 3 |
| Lau134 | Unclassified/Putative Phage | 75.00%  | 6  | 34,286  | 52.18 | 2 |
| Lau135 | Unclassified/Putative Phage | 99.15%  | 19 | 145,920 | 43.13 | 2 |
| Lau136 | Unclassified/Putative Phage | 93.02%  | 3  | 15,424  | 38.21 | 1 |
| Lau137 | Unclassified/Putative Phage | 100.00% | 3  | 13,926  | 39.18 | 3 |
| Lau138 | Unclassified/Putative Phage | 100.00% | 2  | 17,122  | 44.65 | 2 |
| Lau139 | Unclassified/Putative Phage | 82.35%  | 3  | 105,599 | 39.92 | 3 |
| Lau140 | Unclassified/Putative Phage | 81.31%  | 6  | 65,699  | 34.84 | 5 |
| Lau141 | Unclassified/Putative Phage | 94.74%  | 20 | 184,765 | 36.07 | 4 |
| Lau142 | Unclassified/Putative Phage | 95.65%  | 8  | 112,031 | 36.07 | 4 |
| Lau144 | Unclassified/Putative Phage | 100.00% | 1  | 4,266   | 37.79 | 2 |
| Lau146 | Unclassified/Putative Phage | 100.00% | 4  | 19,412  | 48.00 | 2 |
| Lau147 | Unclassified/Putative Phage | 57.14%  | 5  | 39,643  | 36.57 | 3 |
| Lau148 | Unclassified/Putative Phage | 88.66%  | 4  | 39,428  | 33.40 | 2 |
| Lau149 | Unclassified/Putative Phage | 91.40%  | 12 | 65,985  | 37.13 | 4 |
| Lau150 | Unclassified/Putative Phage | 97.67%  | 13 | 79,549  | 38.88 | 3 |
| Lau151 | Unclassified/Putative Phage | 96.67%  | 12 | 116,964 | 37.17 | 5 |
| Lau152 | Unclassified/Putative Phage | 94.12%  | 12 | 126,665 | 41.22 | 4 |
| Lau153 | Unclassified/Putative Phage | 97.50%  | 6  | 42,312  | 44.05 | 3 |
| Lau155 | Unclassified/Putative Phage | 97.14%  | 12 | 67,627  | 35.44 | 2 |
| Lau156 | Unclassified/Putative Phage | 100.00% | 4  | 20,347  | 35.88 | 2 |
| Lau160 | Unclassified/Putative Phage | 64.29%  | 4  | 21,657  | 49.05 | 2 |
| Lau161 | Unclassified/Putative Phage | 100.00% | 4  | 24,106  | 49.63 | 4 |

|        |                                                                              |         |    |         |       |   |
|--------|------------------------------------------------------------------------------|---------|----|---------|-------|---|
| Lau162 | Unclassified/Putative Phage                                                  | 87.65%  | 6  | 46,857  | 51.60 | 3 |
| Lau166 | Unclassified/Putative Phage                                                  | 91.65%  | 35 | 334,702 | 34.60 | 4 |
| Lau167 | Unclassified/Putative Phage                                                  | 92.68%  | 13 | 81,121  | 33.29 | 4 |
| Lau168 | Unclassified/Putative Phage                                                  | 83.33%  | 10 | 84,748  | 34.57 | 4 |
| Lau169 | Unclassified/Putative Phage                                                  | 60.00%  | 4  | 20,769  | 37.97 | 4 |
| Lau170 | Unclassified/Putative Phage                                                  | 53.57%  | 11 | 54,924  | 51.80 | 5 |
| Lau171 | Unclassified/Putative Phage                                                  | 100.00% | 12 | 80,772  | 45.14 | 4 |
| Lau172 | Unclassified/Putative Phage                                                  | 84.45%  | 9  | 56,636  | 51.54 | 1 |
| Lau173 | Bacteria;Proteobacteria;Gammaproteobacteria;Oceanospirillales;Halomonadaceae | 9.47%   | 25 | 155,489 | 53.94 | 2 |
| Lau174 | Unclassified/Putative Phage                                                  | 100.00% | 5  | 27,495  | 47.92 | 4 |
| Lau175 | Unclassified/Putative Phage                                                  | 85.71%  | 3  | 16,053  | 48.28 | 2 |
| Lau180 | Unclassified/Putative Phage                                                  | 80.91%  | 21 | 216,322 | 41.30 | 4 |
| Lau181 | Unclassified/Putative Phage                                                  | 96.55%  | 5  | 37,947  | 41.55 | 3 |
| Lau182 | Unclassified/Putative Phage                                                  | 94.12%  | 7  | 54,907  | 41.26 | 4 |
| Lau183 | Unclassified/Putative Phage                                                  | 93.02%  | 4  | 57,524  | 44.51 | 3 |
| Lau185 | Unclassified/Putative Phage                                                  | 100.00% | 6  | 53,218  | 42.61 | 4 |
| Lau186 | Unclassified/Putative Phage                                                  | 54.84%  | 5  | 28,437  | 40.04 | 5 |
| Lau187 | Unclassified/Putative Phage                                                  | 78.95%  | 6  | 32,069  | 31.03 | 3 |
| Lau189 | Unclassified/Putative Phage                                                  | 80.69%  | 56 | 372,832 | 25.42 | 3 |
| Lau192 | Unclassified/Putative Phage                                                  | 99.38%  | 17 | 75,955  | 39.47 | 4 |
| Lau193 | Unclassified/Putative Phage                                                  | 100.00% | 5  | 24,097  | 39.59 | 3 |
| Lau194 | Unclassified/Putative Phage                                                  | 97.96%  | 7  | 37,358  | 39.98 | 4 |
| Lau195 | Unclassified/Putative Phage                                                  | 81.82%  | 4  | 20,184  | 40.08 | 3 |
| Lau196 | Unclassified/Putative Phage                                                  | 59.38%  | 9  | 44,088  | 55.73 | 2 |
| Lau199 | Unclassified/Putative Phage                                                  | 100.00% | 5  | 21,049  | 45.54 | 3 |
| Lau200 | Unclassified/Putative Phage                                                  | 100.00% | 4  | 18,435  | 53.26 | 3 |
| Lau201 | Unclassified/Putative Phage                                                  | 69.23%  | 6  | 58,028  | 45.03 | 4 |
| Lau204 | Unclassified/Putative Phage                                                  | 93.33%  | 7  | 58,332  | 60.77 | 2 |
| Lau205 | Unclassified/Putative Phage                                                  | 100.00% | 7  | 38,521  | 45.72 | 3 |
| Lau206 | Unclassified/Putative Phage                                                  | 100.00% | 7  | 41,711  | 41.51 | 4 |
| Lau207 | Unclassified/Putative Phage                                                  | 66.67%  | 5  | 23,211  | 40.40 | 4 |
| Lau209 | Unclassified/Putative Phage                                                  | 66.67%  | 7  | 48,035  | 37.52 | 4 |
| Lau211 | Unclassified/Putative Phage                                                  | 80.00%  | 5  | 26,792  | 41.41 | 3 |
| Lau212 | Unclassified/Putative Phage                                                  | 100.00% | 4  | 17,419  | 40.21 | 3 |
| Lau213 | Unclassified/Putative Phage                                                  | 100.00% | 6  | 30,420  | 41.41 | 3 |
| Lau214 | Unclassified/Putative Phage                                                  | 54.55%  | 8  | 40,092  | 40.06 | 3 |
| Lau215 | Unclassified/Putative Phage                                                  | 100.00% | 6  | 40,915  | 40.67 | 4 |
| Lau216 | Unclassified/Putative Phage                                                  | 100.00% | 6  | 54,858  | 40.21 | 3 |
| Lau217 | Unclassified/Putative Phage                                                  | 95.83%  | 8  | 62,603  | 50.88 | 2 |
| Lau218 | Viruses;dsdna viruses (no map stage);Caudovirales;Podoviridae                | 73.33%  | 6  | 83,236  | 34.56 | 3 |
| Lau219 | Unclassified/Putative Phage                                                  | 100.00% | 4  | 19,816  | 49.43 | 2 |



|        |                                                  |         |    |         |       |   |
|--------|--------------------------------------------------|---------|----|---------|-------|---|
| Lau220 | Viruses:dsdna viruses (no ma stage);Unclassified | 84.91%  | 32 | 224,624 | 41.57 | 3 |
| Lau221 | Unclassified/Putative Phage                      | 66.67%  | 5  | 42,040  | 41.44 | 3 |
| Lau222 | Unclassified/Putative Phage                      | 53.85%  | 7  | 54,480  | 44.04 | 3 |
| Lau223 | Unclassified/Putative Phage                      | 95.00%  | 5  | 36,732  | 43.19 | 5 |
| Lau224 | Unclassified/Putative Phage                      | 73.08%  | 5  | 42,140  | 41.32 | 3 |
| Lau225 | Unclassified/Putative Phage                      | 75.00%  | 8  | 60,916  | 41.35 | 3 |
| Lau226 | Unclassified/Putative Phage                      | 73.17%  | 4  | 25,815  | 43.64 | 4 |
| Lau228 | Unclassified/Putative Phage                      | 64.71%  | 77 | 377,454 | 14.39 | 3 |
| Lau232 | Unclassified/Putative Phage                      | 95.06%  | 12 | 65,147  | 42.50 | 2 |
| Lau234 | Unclassified/Putative Phage                      | 92.50%  | 16 | 81,867  | 19.86 | 2 |
| Lau235 | Unclassified/Putative Phage                      | 85.00%  | 5  | 59,588  | 38.57 | 3 |
| Lau238 | Unclassified/Putative Phage                      | 57.14%  | 5  | 31,516  | 60.58 | 2 |
| Lau241 | Unclassified/Putative Phage                      | 96.43%  | 6  | 178,448 | 41.08 | 3 |
| Lau242 | Unclassified/Putative Phage                      | 98.89%  | 7  | 48,694  | 39.89 | 3 |
| Lau243 | Unclassified/Putative Phage                      | 85.00%  | 6  | 34,056  | 36.57 | 3 |
| Lau244 | Unclassified/Putative Phage                      | 100.00% | 3  | 14,339  | 43.59 | 2 |
| Lau245 | Unclassified/Putative Phage                      | 71.43%  | 5  | 23,944  | 41.81 | 5 |
| Lau246 | Unclassified/Putative Phage                      | 33.33%  | 3  | 39,701  | 44.89 | 2 |
| Lau247 | Unclassified/Putative Phage                      | 92.86%  | 10 | 101,421 | 51.21 | 3 |
| Lau254 | Unclassified/Putative Phage                      | 76.92%  | 3  | 40,485  | 53.90 | 2 |
| Lau256 | Unclassified/Putative Phage                      | 86.67%  | 7  | 50,225  | 55.35 | 4 |
| Lau257 | Unclassified/Putative Phage                      | 73.68%  | 11 | 64,635  | 49.12 | 5 |
| Lau260 | Unclassified/Putative Phage                      | 50.00%  | 7  | 71,726  | 42.90 | 5 |
| Lau263 | Unclassified/Putative Phage                      | 60.87%  | 5  | 24,660  | 39.09 | 4 |
| Lau264 | Unclassified/Putative Phage                      | 71.43%  | 6  | 38,540  | 40.67 | 5 |
| Lau267 | Unclassified/Putative Phage                      | 75.00%  | 4  | 18,746  | 42.52 | 3 |
| Lau271 | Unclassified/Putative Phage                      | 75.00%  | 4  | 28,995  | 54.83 | 4 |
| Lau272 | Unclassified/Putative Phage                      | 45.83%  | 26 | 181,661 | 53.94 | 4 |
| Lau273 | Unclassified/Putative Phage                      | 40.00%  | 12 | 82,859  | 50.73 | 3 |
| Lau274 | Unclassified/Putative Phage                      | 69.70%  | 8  | 71,390  | 50.94 | 3 |
| Lau278 | Unclassified/Putative Phage                      | 100.00% | 4  | 45,859  | 50.80 | 4 |
| Lau279 | Unclassified/Putative Phage                      | 93.75%  | 13 | 118,039 | 39.94 | 3 |
| Lau280 | Unclassified/Putative Phage                      | 87.81%  | 8  | 54,984  | 40.97 | 3 |
| Lau281 | Unclassified/Putative Phage                      | 100.00% | 2  | 27,017  | 35.45 | 4 |
| Lau282 | Unclassified/Putative Phage                      | 78.13%  | 10 | 134,212 | 39.02 | 4 |
| Lau283 | Unclassified/Putative Phage                      | 94.12%  | 4  | 26,173  | 41.54 | 3 |
| Lau284 | Unclassified/Putative Phage                      | 70.83%  | 6  | 41,525  | 41.05 | 3 |
| Lau285 | Unclassified/Putative Phage                      | 86.11%  | 5  | 30,187  | 38.96 | 3 |
| Lau286 | Unclassified/Putative Phage                      | 87.50%  | 6  | 36,609  | 46.08 | 5 |
| Lau287 | Unclassified/Putative Phage                      | 90.91%  | 7  | 54,240  | 41.81 | 3 |
| Lau288 | Unclassified/Putative Phage                      | 75.00%  | 9  | 72,763  | 38.78 | 5 |

|        |                                                                             |         |    |         |       |   |
|--------|-----------------------------------------------------------------------------|---------|----|---------|-------|---|
| Lau289 | Viruses;dsdna viruses (no ma stage);Caudovirales;Myoviridae;T4-like viruses | 91.43%  | 8  | 110,857 | 33.29 | 5 |
| Lau291 | Unclassified/Putative Phage                                                 | 100.00% | 5  | 32,046  | 37.11 | 3 |
| Lau292 | Unclassified/Putative Phage                                                 | 88.89%  | 7  | 33,690  | 39.75 | 4 |
| Lau293 | Unclassified/Putative Phage                                                 | 83.78%  | 6  | 32,332  | 42.88 | 2 |
| Lau294 | Unclassified/Putative Phage                                                 | 61.49%  | 12 | 102,283 | 37.90 | 3 |
| Lau295 | Unclassified/Putative Phage                                                 | 80.00%  | 5  | 26,793  | 39.95 | 3 |
| Lau296 | Unclassified/Putative Phage                                                 | 100.00% | 11 | 96,278  | 39.39 | 4 |
| Lau297 | Unclassified/Putative Phage                                                 | 70.31%  | 9  | 62,434  | 36.25 | 4 |
| Lau298 | Unclassified/Putative Phage                                                 | 90.24%  | 5  | 60,744  | 36.53 | 3 |
| Lau300 | Unclassified/Putative Phage                                                 | 95.65%  | 8  | 51,386  | 50.20 | 4 |
| Lau302 | Unclassified/Putative Phage                                                 | 100.00% | 3  | 14,841  | 52.10 | 2 |
| Lau303 | Unclassified/Putative Phage                                                 | 53.33%  | 5  | 28,013  | 43.12 | 5 |
| Lau304 | Unclassified/Putative Phage                                                 | 50.00%  | 7  | 48,782  | 39.82 | 5 |
| Lau308 | Unclassified/Putative Phage                                                 | 77.78%  | 5  | 25,088  | 47.84 | 2 |
| Lau309 | Unclassified/Putative Phage                                                 | 72.73%  | 6  | 29,853  | 42.90 | 3 |
| Lau311 | Unclassified/Putative Phage                                                 | 99.02%  | 7  | 47,886  | 26.40 | 3 |
| Lau312 | Unclassified/Putative Phage                                                 | 100.00% | 2  | 12,628  | 51.04 | 1 |
| Lau313 | Unclassified/Putative Phage                                                 | 92.86%  | 4  | 21,420  | 35.84 | 3 |
| Lau314 | Unclassified/Putative Phage                                                 | 100.00% | 5  | 42,723  | 39.31 | 3 |
| Lau315 | Unclassified/Putative Phage                                                 | 76.00%  | 3  | 26,353  | 38.61 | 3 |
| Lau316 | Unclassified/Putative Phage                                                 | 87.50%  | 7  | 64,627  | 39.33 | 4 |
| Lau317 | Unclassified/Putative Phage                                                 | 70.00%  | 2  | 10,969  | 39.77 | 2 |
| Lau318 | Unclassified/Putative Phage                                                 | 94.60%  | 7  | 39,582  | 35.83 | 4 |
| Lau319 | Unclassified/Putative Phage                                                 | 78.95%  | 5  | 49,849  | 40.50 | 2 |
| Lau320 | Unclassified/Putative Phage                                                 | 80.00%  | 2  | 10,834  | 37.40 | 1 |
| Lau325 | Unclassified/Putative Phage                                                 | 84.93%  | 12 | 81,164  | 35.11 | 3 |
| Lau326 | Unclassified/Putative Phage                                                 | 83.33%  | 5  | 62,189  | 36.82 | 4 |
| Lau327 | Unclassified/Putative Phage                                                 | 72.73%  | 6  | 31,947  | 37.85 | 4 |
| Lau328 | Unclassified/Putative Phage                                                 | 47.06%  | 6  | 36,298  | 51.14 | 1 |
| Lau329 | Unclassified/Putative Phage                                                 | 75.00%  | 2  | 8,463   | 37.70 | 1 |
| Lau330 | Unclassified/Putative Phage                                                 | 76.19%  | 6  | 27,500  | 31.59 | 4 |
| Lau333 | Unclassified/Putative Phage                                                 | 70.00%  | 2  | 10,879  | 48.00 | 1 |
| Lau334 | Unclassified/Putative Phage                                                 | 100.00% | 4  | 24,216  | 49.68 | 3 |
| Lau336 | Unclassified/Putative Phage                                                 | 100.00% | 6  | 61,907  | 49.63 | 4 |
| Lau337 | Unclassified/Putative Phage                                                 | 100.00% | 4  | 23,743  | 46.45 | 4 |
| Lau338 | Unclassified/Putative Phage                                                 | 60.00%  | 3  | 15,394  | 39.14 | 3 |
| Lau340 | Unclassified/Putative Phage                                                 | 96.55%  | 5  | 23,862  | 53.97 | 2 |
| Lau342 | Unclassified/Putative Phage                                                 | 56.25%  | 50 | 308,246 | 44.44 | 5 |
| Lau343 | Unclassified/Putative Phage                                                 | 80.00%  | 7  | 49,298  | 47.13 | 2 |
| Lau344 | Unclassified/Putative Phage                                                 | 83.33%  | 2  | 14,406  | 40.77 | 2 |
| Lau345 | Unclassified/Putative Phage                                                 | 100.00% | 8  | 68,376  | 52.23 | 4 |

|        |                             |         |    |         |       |   |
|--------|-----------------------------|---------|----|---------|-------|---|
| Lau351 | Unclassified/Putative Phage | 90.91%  | 5  | 44,898  | 44.73 | 3 |
| Lau352 | Unclassified/Putative Phage | 100.00% | 6  | 30,618  | 43.92 | 3 |
| Lau353 | Unclassified/Putative Phage | 86.57%  | 13 | 119,349 | 38.58 | 5 |
| Lau354 | Unclassified/Putative Phage | 100.00% | 5  | 24,439  | 35.79 | 4 |
| Lau355 | Unclassified/Putative Phage | 75.00%  | 3  | 22,836  | 41.19 | 2 |
| Lau356 | Unclassified/Putative Phage | 60.61%  | 5  | 37,042  | 39.92 | 4 |
| Lau357 | Unclassified/Putative Phage | 78.38%  | 7  | 53,981  | 40.40 | 4 |
| Lau358 | Unclassified/Putative Phage | 91.31%  | 2  | 75,100  | 37.02 | 2 |
| Lau359 | Unclassified/Putative Phage | 100.00% | 5  | 31,939  | 36.89 | 5 |
| Lau360 | Unclassified/Putative Phage | 98.31%  | 7  | 43,475  | 36.74 | 2 |
| Lau367 | Unclassified/Putative Phage | 90.48%  | 4  | 47,563  | 37.62 | 3 |
| Lau368 | Unclassified/Putative Phage | 100.00% | 5  | 34,212  | 47.17 | 4 |
| Lau370 | Unclassified/Putative Phage | 57.14%  | 8  | 54,650  | 40.97 | 4 |
| Lau372 | Unclassified/Putative Phage | 100.00% | 12 | 94,976  | 39.46 | 4 |
| Lau373 | Unclassified/Putative Phage | 100.00% | 4  | 59,850  | 34.21 | 3 |
| Lau380 | Unclassified/Putative Phage | 76.00%  | 2  | 12,760  | 36.18 | 2 |
| Lau381 | Unclassified/Putative Phage | 100.00% | 4  | 97,482  | 35.03 | 4 |
| Lau382 | Unclassified/Putative Phage | 100.00% | 3  | 16,557  | 39.47 | 3 |
| Lau383 | Unclassified/Putative Phage | 100.00% | 2  | 11,382  | 51.88 | 2 |
| Lau384 | Unclassified/Putative Phage | 100.00% | 2  | 22,564  | 36.23 | 2 |
| Lau385 | Unclassified/Putative Phage | 100.00% | 4  | 28,322  | 48.67 | 4 |
| Lau386 | Unclassified/Putative Phage | 89.47%  | 1  | 31,483  | 34.93 | 1 |
| Lau387 | Unclassified/Putative Phage | 42.86%  | 2  | 8,740   | 48.64 | 2 |
| Lau388 | Unclassified/Putative Phage | 75.00%  | 4  | 23,139  | 32.52 | 3 |
| Lau389 | Unclassified/Putative Phage | 100.00% | 3  | 13,064  | 37.83 | 2 |

**Supplementary Table 7. Conserved LSU proteins identified in bacterial and archaeal bins**

| Bin name | Large subunit ribosomal proteins |         |         |         |         |         |         |         |          |         |         |
|----------|----------------------------------|---------|---------|---------|---------|---------|---------|---------|----------|---------|---------|
|          | COG0080                          | COG0081 | COG0087 | COG0091 | COG0093 | COG0094 | COG0097 | COG0102 | COG0197  | COG0200 | COG0256 |
|          | L11                              | L1      | L3      | L22     | L14     | L5      | L6P/L9E | L13     | L16/L10E | L15     | L18     |
| Lau1     | 1                                | 1       | 1       | 1       | 1       | 1       | 1       | 1       | 1        | 1       | 1       |
| Lau2     | 0                                | 0       | 0       | 0       | 0       | 0       | 0       | 1       | 0        | 0       | 0       |
| Lau3     | 0                                | 0       | 0       | 0       | 1       | 1       | 1       | 1       | 0        | 1       | 1       |
| Lau4     | 3                                | 3       | 2       | 2       | 2       | 2       | 2       | 1       | 2        | 2       | 2       |
| Lau5     | 2                                | 2       | 1       | 1       | 1       | 1       | 2       | 2       | 1        | 2       | 2       |
| Lau6     | 3                                | 3       | 2       | 3       | 3       | 3       | 2       | 4       | 4        | 2       | 2       |
| Lau7     | 1                                | 1       | 2       | 2       | 2       | 2       | 1       | 9       | 2        | 0       | 1       |
| Lau9     | 0                                | 0       | 0       | 0       | 0       | 0       | 0       | 1       | 0        | 0       | 0       |
| Lau10    | 3                                | 4       | 4       | 4       | 5       | 5       | 5       | 4       | 5        | 5       | 5       |
| Lau11    | 1                                | 1       | 1       | 1       | 1       | 1       | 1       | 3       | 1        | 1       | 1       |
| Lau12    | 0                                | 0       | 0       | 0       | 0       | 0       | 0       | 0       | 0        | 0       | 0       |
| Lau14    | 10                               | 9       | 23      | 26      | 27      | 33      | 33      | 19      | 18       | 23      | 21      |
| Lau15    | 0                                | 0       | 0       | 0       | 0       | 0       | 0       | 0       | 0        | 0       | 0       |
| Lau16    | 1                                | 1       | 1       | 1       | 2       | 2       | 2       | 3       | 1        | 2       | 2       |
| Lau17    | 1                                | 1       | 1       | 1       | 1       | 2       | 3       | 5       | 1        | 3       | 3       |
| Lau19    | 10                               | 11      | 3       | 2       | 2       | 2       | 1       | 8       | 7        | 5       | 6       |
| Lau20    | 7                                | 8       | 4       | 7       | 7       | 8       | 8       | 5       | 7        | 8       | 8       |
| Lau21    | 0                                | 0       | 1       | 0       | 0       | 0       | 0       | 3       | 0        | 1       | 1       |
| Lau22    | 0                                | 0       | 0       | 0       | 0       | 0       | 0       | 0       | 0        | 0       | 0       |
| Lau23    | 1                                | 1       | 1       | 1       | 1       | 1       | 1       | 1       | 1        | 1       | 1       |
| Lau24    | 0                                | 0       | 0       | 0       | 0       | 0       | 0       | 0       | 0        | 0       | 0       |
| Lau26    | 0                                | 0       | 0       | 0       | 0       | 0       | 0       | 0       | 0        | 0       | 0       |
| Lau27    | 0                                | 0       | 0       | 0       | 0       | 0       | 0       | 0       | 0        | 0       | 0       |
| Lau28    | 0                                | 0       | 0       | 0       | 0       | 0       | 0       | 0       | 0        | 0       | 0       |
| Lau29    | 0                                | 0       | 0       | 0       | 0       | 0       | 0       | 0       | 0        | 0       | 0       |
| Lau30    | 0                                | 0       | 1       | 0       | 0       | 0       | 2       | 3       | 0        | 1       | 1       |

|        |   |   |   |   |   |   |   |    |   |   |   |
|--------|---|---|---|---|---|---|---|----|---|---|---|
| Lau31  | 0 | 0 | 1 | 0 | 0 | 1 | 1 | 1  | 0 | 1 | 1 |
| Lau32  | 0 | 0 | 0 | 0 | 0 | 0 | 0 | 0  | 0 | 0 | 0 |
| Lau33  | 0 | 0 | 0 | 0 | 0 | 0 | 0 | 0  | 0 | 0 | 0 |
| Lau34  | 0 | 0 | 0 | 0 | 0 | 0 | 0 | 0  | 0 | 0 | 0 |
| Lau35  | 0 | 0 | 0 | 0 | 0 | 0 | 0 | 1  | 0 | 0 | 0 |
| Lau36  | 6 | 7 | 4 | 4 | 5 | 5 | 5 | 0  | 5 | 5 | 5 |
| Lau40  | 0 | 0 | 0 | 0 | 0 | 0 | 0 | 0  | 0 | 0 | 0 |
| Lau41  | 0 | 0 | 3 | 3 | 2 | 2 | 1 | 5  | 2 | 1 | 1 |
| Lau42  | 2 | 2 | 2 | 1 | 1 | 1 | 1 | 3  | 1 | 1 | 2 |
| Lau44  | 2 | 2 | 0 | 0 | 2 | 3 | 3 | 3  | 1 | 3 | 3 |
| Lau45  | 0 | 0 | 0 | 0 | 0 | 0 | 0 | 0  | 0 | 0 | 0 |
| Lau46  | 0 | 0 | 0 | 0 | 0 | 0 | 0 | 0  | 0 | 0 | 0 |
| Lau47  | 5 | 5 | 7 | 7 | 7 | 5 | 4 | 7  | 7 | 4 | 4 |
| Lau51  | 0 | 0 | 0 | 0 | 0 | 0 | 0 | 0  | 0 | 0 | 0 |
| Lau52  | 0 | 0 | 0 | 0 | 0 | 0 | 0 | 0  | 0 | 0 | 0 |
| Lau53  | 0 | 0 | 0 | 0 | 0 | 0 | 0 | 0  | 0 | 0 | 0 |
| Lau60  | 2 | 2 | 3 | 3 | 4 | 4 | 3 | 1  | 4 | 4 | 3 |
| Lau62  | 4 | 4 | 4 | 4 | 4 | 4 | 4 | 4  | 4 | 4 | 3 |
| Lau64  | 1 | 1 | 1 | 1 | 1 | 1 | 1 | 2  | 1 | 1 | 1 |
| Lau65  | 0 | 3 | 1 | 0 | 0 | 0 | 0 | 5  | 1 | 0 | 0 |
| Lau66  | 0 | 0 | 0 | 0 | 0 | 0 | 0 | 0  | 0 | 0 | 0 |
| Lau92  | 2 | 2 | 1 | 1 | 1 | 1 | 1 | 1  | 2 | 1 | 1 |
| Lau93  | 0 | 0 | 0 | 0 | 0 | 0 | 1 | 0  | 0 | 2 | 2 |
| Lau94  | 1 | 1 | 1 | 0 | 1 | 1 | 1 | 1  | 0 | 1 | 1 |
| Lau95  | 0 | 0 | 0 | 0 | 0 | 0 | 0 | 0  | 0 | 0 | 0 |
| Lau96  | 0 | 0 | 0 | 0 | 1 | 1 | 1 | 1  | 0 | 1 | 1 |
| Lau98  | 0 | 0 | 0 | 0 | 0 | 0 | 0 | 0  | 0 | 0 | 0 |
| Lau101 | 0 | 0 | 0 | 0 | 0 | 0 | 0 | 0  | 0 | 0 | 0 |
| Lau103 | 5 | 5 | 3 | 3 | 6 | 6 | 8 | 14 | 5 | 9 | 8 |
| Lau104 | 0 | 0 | 0 | 1 | 2 | 2 | 1 | 3  | 1 | 1 | 1 |

|        |   |   |   |   |   |   |   |   |   |   |   |   |
|--------|---|---|---|---|---|---|---|---|---|---|---|---|
| Lau112 | 0 | 0 | 0 | 0 | 0 | 0 | 0 | 0 | 0 | 0 | 0 | 0 |
| Lau113 | 0 | 1 | 2 | 1 | 2 | 2 | 2 | 2 | 2 | 1 | 2 | 2 |
| Lau114 | 0 | 0 | 0 | 0 | 0 | 0 | 0 | 0 | 1 | 0 | 0 | 0 |
| Lau115 | 0 | 0 | 0 | 0 | 0 | 0 | 0 | 0 | 0 | 0 | 0 | 0 |
| Lau117 | 0 | 0 | 0 | 0 | 0 | 0 | 0 | 0 | 0 | 0 | 0 | 0 |
| Lau118 | 0 | 0 | 1 | 0 | 0 | 0 | 0 | 0 | 2 | 0 | 1 | 0 |
| Lau122 | 0 | 0 | 0 | 0 | 0 | 0 | 0 | 0 | 0 | 0 | 0 | 0 |
| Lau123 | 0 | 0 | 0 | 0 | 0 | 0 | 0 | 0 | 1 | 0 | 0 | 0 |
| Lau125 | 1 | 1 | 0 | 0 | 0 | 0 | 0 | 0 | 0 | 0 | 0 | 0 |
| Lau126 | 0 | 0 | 0 | 0 | 0 | 0 | 0 | 0 | 0 | 0 | 0 | 0 |
| Lau127 | 0 | 0 | 0 | 0 | 0 | 0 | 0 | 0 | 0 | 0 | 0 | 0 |
| Lau129 | 0 | 0 | 0 | 0 | 0 | 0 | 0 | 0 | 0 | 0 | 0 | 0 |
| Lau143 | 0 | 0 | 0 | 0 | 0 | 0 | 0 | 0 | 0 | 0 | 0 | 0 |
| Lau158 | 0 | 0 | 0 | 0 | 0 | 0 | 0 | 0 | 0 | 0 | 0 | 0 |
| Lau159 | 0 | 0 | 0 | 0 | 0 | 0 | 0 | 0 | 0 | 0 | 0 | 0 |
| Lau163 | 0 | 0 | 0 | 0 | 0 | 0 | 0 | 0 | 0 | 0 | 0 | 0 |
| Lau164 | 0 | 0 | 0 | 0 | 0 | 0 | 0 | 0 | 0 | 0 | 0 | 0 |
| Lau176 | 1 | 1 | 0 | 1 | 1 | 1 | 1 | 1 | 1 | 1 | 1 | 1 |
| Lau177 | 0 | 0 | 0 | 0 | 0 | 0 | 0 | 0 | 1 | 0 | 0 | 0 |
| Lau178 | 0 | 0 | 0 | 0 | 0 | 0 | 0 | 0 | 0 | 0 | 0 | 0 |
| Lau179 | 0 | 0 | 0 | 0 | 0 | 0 | 0 | 0 | 0 | 0 | 0 | 0 |
| Lau184 | 0 | 0 | 0 | 0 | 0 | 0 | 0 | 0 | 0 | 0 | 0 | 0 |
| Lau190 | 0 | 0 | 4 | 1 | 2 | 2 | 2 | 0 | 2 | 2 | 2 | 2 |
| Lau197 | 0 | 0 | 0 | 0 | 0 | 0 | 0 | 0 | 0 | 0 | 0 | 0 |
| Lau198 | 0 | 0 | 0 | 0 | 0 | 0 | 0 | 0 | 0 | 0 | 0 | 0 |
| Lau203 | 0 | 0 | 0 | 0 | 0 | 0 | 0 | 0 | 0 | 0 | 0 | 0 |
| Lau208 | 0 | 0 | 0 | 0 | 0 | 0 | 0 | 0 | 0 | 0 | 0 | 0 |
| Lau210 | 0 | 0 | 0 | 0 | 0 | 0 | 0 | 0 | 0 | 0 | 0 | 0 |
| Lau227 | 2 | 2 | 2 | 2 | 2 | 2 | 2 | 2 | 2 | 2 | 1 | 2 |
| Lau229 | 0 | 0 | 1 | 0 | 0 | 0 | 0 | 0 | 1 | 0 | 0 | 0 |













**Supplementary Table 9.** Other conserved genes in identified bacterial and archaeal bins

| Bin name | tRNA synthetases                           |                         |                           |                          |                           |                       |                                     |                        |                       | RNA polymerase subunits                                  |                                                          |                  |                          |
|----------|--------------------------------------------|-------------------------|---------------------------|--------------------------|---------------------------|-----------------------|-------------------------------------|------------------------|-----------------------|----------------------------------------------------------|----------------------------------------------------------|------------------|--------------------------|
|          | COG0016                                    | COG0018                 | COG0060                   | COG0124                  | COG0143                   | COG0172               | COG0201                             | COG0495                | COG0525               | COG0202                                                  | COG00085                                                 | COG00012         | COG0533                  |
|          | Phenylalanyl-tRNA synthetase alpha subunit | Arginyl-tRNA synthetase | Isoleucyl-tRNA synthetase | Histidyl-tRNA synthetase | Methionyl-tRNA synthetase | Seryl-tRNA synthetase | Preprotein translocase subunit SecY | Leucyl-tRNA synthetase | Valyl-tRNA synthetase | DNA-directed RNA polymerase, alpha subunit/40 kD subunit | DNA-directed RNA polymerase, beta subunit/140 kD subunit | Predicted GTPase | Metal-dependent protease |
| Lau1     | 0                                          | 1                       | 1                         | 1                        | 1                         | 1                     | 1                                   | 1                      | 1                     | 1                                                        | 1                                                        | 1                | 1                        |
| Lau2     | 1                                          | 1                       | 1                         | 0                        | 0                         | 0                     | 1                                   | 0                      | 1                     | 0                                                        | 0                                                        | 1                | 0                        |
| Lau3     | 0                                          | 1                       | 2                         | 0                        | 0                         | 2                     | 1                                   | 4                      | 2                     | 1                                                        | 0                                                        | 0                | 0                        |
| Lau4     | 1                                          | 1                       | 2                         | 2                        | 1                         | 2                     | 2                                   | 2                      | 2                     | 2                                                        | 3                                                        | 2                | 1                        |
| Lau5     | 2                                          | 2                       | 2                         | 2                        | 2                         | 2                     | 2                                   | 2                      | 3                     | 2                                                        | 2                                                        | 2                | 2                        |
| Lau6     | 4                                          | 4                       | 2                         | 4                        | 4                         | 4                     | 2                                   | 4                      | 4                     | 5                                                        | 4                                                        | 4                | 4                        |
| Lau7     | 1                                          | 12                      | 6                         | 12                       | 5                         | 11                    | 0                                   | 14                     | 4                     | 9                                                        | 1                                                        | 5                | 7                        |
| Lau8     | 0                                          | 0                       | 0                         | 0                        | 0                         | 3                     | 0                                   | 0                      | 1                     | 0                                                        | 0                                                        | 0                | 0                        |
| Lau9     | 0                                          | 1                       | 1                         | 1                        | 1                         | 2                     | 0                                   | 3                      | 3                     | 0                                                        | 0                                                        | 5                | 1                        |
| Lau10    | 9                                          | 12                      | 13                        | 10                       | 9                         | 13                    | 4                                   | 16                     | 8                     | 6                                                        | 16                                                       | 7                | 3                        |
| Lau11    | 2                                          | 3                       | 1                         | 1                        | 1                         | 2                     | 1                                   | 2                      | 1                     | 1                                                        | 1                                                        | 2                | 2                        |
| Lau12    | 1                                          | 0                       | 0                         | 0                        | 0                         | 1                     | 0                                   | 0                      | 1                     | 0                                                        | 0                                                        | 1                | 1                        |
| Lau14    | 18                                         | 20                      | 36                        | 14                       | 12                        | 27                    | 27                                  | 21                     | 35                    | 24                                                       | 25                                                       | 33               | 35                       |
| Lau15    | 0                                          | 0                       | 0                         | 2                        | 0                         | 1                     | 1                                   | 0                      | 1                     | 0                                                        | 0                                                        | 0                | 1                        |
| Lau16    | 1                                          | 3                       | 4                         | 2                        | 4                         | 3                     | 3                                   | 2                      | 6                     | 2                                                        | 1                                                        | 2                | 5                        |
| Lau17    | 6                                          | 8                       | 4                         | 7                        | 8                         | 12                    | 10                                  | 7                      | 8                     | 10                                                       | 1                                                        | 3                | 5                        |
| Lau19    | 3                                          | 10                      | 17                        | 13                       | 17                        | 14                    | 11                                  | 11                     | 4                     | 6                                                        | 14                                                       | 24               | 9                        |
| Lau20    | 6                                          | 9                       | 9                         | 9                        | 5                         | 6                     | 8                                   | 1                      | 7                     | 5                                                        | 10                                                       | 7                | 9                        |
| Lau21    | 4                                          | 2                       | 4                         | 0                        | 4                         | 1                     | 1                                   | 8                      | 4                     | 2                                                        | 5                                                        | 3                | 1                        |
| Lau22    | 1                                          | 1                       | 1                         | 1                        | 1                         | 1                     | 0                                   | 1                      | 1                     | 0                                                        | 0                                                        | 0                | 0                        |
| Lau23    | 1                                          | 1                       | 2                         | 1                        | 1                         | 1                     | 1                                   | 1                      | 2                     | 1                                                        | 1                                                        | 1                | 1                        |
| Lau24    | 0                                          | 1                       | 0                         | 0                        | 1                         | 1                     | 0                                   | 1                      | 0                     | 0                                                        | 0                                                        | 0                | 0                        |





|        |   |   |   |   |   |   |   |   |   |   |   |   |   |
|--------|---|---|---|---|---|---|---|---|---|---|---|---|---|
| Lau203 | 0 | 1 | 0 | 0 | 1 | 0 | 0 | 0 | 0 | 0 | 0 | 0 | 0 |
| Lau208 | 0 | 0 | 0 | 0 | 0 | 0 | 0 | 0 | 0 | 0 | 0 | 0 | 0 |
| Lau210 | 0 | 0 | 0 | 0 | 0 | 0 | 0 | 0 | 0 | 0 | 0 | 0 | 0 |
| Lau227 | 1 | 0 | 2 | 2 | 2 | 1 | 4 | 3 | 3 | 1 | 2 | 0 | 0 |
| Lau229 | 1 | 1 | 1 | 3 | 1 | 1 | 0 | 1 | 1 | 0 | 0 | 0 | 1 |
| Lau230 | 0 | 4 | 6 | 4 | 3 | 0 | 2 | 0 | 3 | 1 | 3 | 5 | 0 |
| Lau231 | 0 | 0 | 0 | 0 | 0 | 0 | 4 | 0 | 0 | 3 | 6 | 0 | 0 |
| Lau233 | 0 | 0 | 0 | 0 | 0 | 0 | 0 | 1 | 0 | 0 | 0 | 0 | 0 |
| Lau236 | 0 | 1 | 1 | 0 | 0 | 0 | 1 | 1 | 0 | 1 | 0 | 0 | 0 |
| Lau237 | 0 | 0 | 0 | 0 | 0 | 0 | 0 | 0 | 0 | 0 | 0 | 0 | 0 |
| Lau248 | 0 | 0 | 0 | 0 | 0 | 0 | 0 | 0 | 0 | 0 | 0 | 0 | 0 |
| Lau249 | 0 | 1 | 0 | 0 | 0 | 0 | 0 | 0 | 0 | 0 | 0 | 0 | 0 |
| Lau252 | 0 | 0 | 0 | 0 | 0 | 0 | 0 | 0 | 0 | 0 | 0 | 0 | 0 |
| Lau259 | 1 | 0 | 0 | 0 | 0 | 0 | 0 | 0 | 0 | 0 | 0 | 0 | 0 |
| Lau265 | 0 | 0 | 0 | 0 | 0 | 0 | 0 | 0 | 0 | 0 | 0 | 0 | 0 |
| Lau269 | 0 | 0 | 0 | 0 | 0 | 0 | 0 | 0 | 0 | 0 | 0 | 0 | 0 |
| Lau331 | 0 | 0 | 1 | 0 | 0 | 0 | 0 | 0 | 0 | 0 | 0 | 0 | 0 |
| Lau371 | 0 | 0 | 0 | 0 | 0 | 0 | 0 | 0 | 0 | 0 | 0 | 0 | 0 |
| Lau374 | 0 | 0 | 0 | 3 | 1 | 0 | 0 | 0 | 1 | 1 | 2 | 0 | 0 |
| Lau375 | 0 | 0 | 4 | 1 | 0 | 0 | 0 | 0 | 0 | 0 | 5 | 0 | 7 |
| Lau376 | 3 | 0 | 0 | 0 | 2 | 3 | 3 | 1 | 1 | 2 | 3 | 0 | 0 |
| Lau377 | 0 | 2 | 4 | 3 | 0 | 3 | 2 | 2 | 0 | 2 | 0 | 1 | 3 |
| Lau378 | 3 | 0 | 0 | 0 | 0 | 7 | 1 | 4 | 3 | 2 | 0 | 0 | 4 |
| Lau379 | 0 | 0 | 0 | 0 | 0 | 0 | 0 | 0 | 1 | 0 | 0 | 0 | 0 |

**Supplementary Table S10. List of identified soxZ genes and their amino acid identities to best hits in Genbank.**

| Scaffold                  | Bin    | IMG Gene ID          | Gene Size (bp) | % Id | NCBI Database Best Hit                                       |
|---------------------------|--------|----------------------|----------------|------|--------------------------------------------------------------|
| Abe_scaffold_36           | Lau113 | Abe_1000003728       | 311            | 63   | Methylobacter tundripaludum (WP_006893629)                   |
| Abe_scaffold_515          | Lau51  | Abe_1000051623       | 302            | 65   | Uncultured SUP05 bacterium (EEZ80661)                        |
| Abe_scaffold_9180         | Lau20  | Abe_100091814        | 353            | 90   | SAR324 cluster bacterium SCGC AAA001-C10 (WP_010512894)      |
| Abe_scaffold_17538        | Lau20  | Abe_100175394        | 326            | 84   | Deltaproteobacteria bacterium SCGC AAA003-F15 (WP_029734853) |
| Abe_scaffold_17577        | Lau10  | Abe_100175783        | 302            | 56   | Uncultured SUP05 bacterium (EEZ80661)                        |
| Kilo_Moana_scaffold_51    | Lau113 | KiloMoana_1000005230 | 311            | 63   | Methylobacter tundripaludum (WP_006893629)                   |
| Kilo_Moana_scaffold_91    | Lau60  | KiloMoana_1000009231 | 311            | 51   | Thiobacillus denitrificans (WP_011311077)                    |
| Kilo_Moana_scaffold_256   | Lau60  | KiloMoana_1000025739 | 311            | 65   | uncultured hydrothermal vent organism (ACZ28666)             |
| Kilo_Moana_scaffold_987   | Lau376 | KiloMoana_1000098810 | 338            | 91   | SAR324 cluster bacterium SCGC AAA001-C10 (WP_010512894)      |
| Kilo_Moana_scaffold_1856  | Lau20  | KiloMoana_1000185715 | 326            | 84   | Deltaproteobacteria bacterium SCGC AAA003-F15 (WP_029734853) |
| Kilo_Moana_scaffold_2824  | Lau10  | KiloMoana_100028252  | 302            | 90   | Uncultured SUP05 bacterium (EEZ80661)                        |
| Kilo_Moana_scaffold_3404  | Lau10  | KiloMoana_100034055  | 302            | 86   | Uncultured SUP05 bacterium (EEZ80661)                        |
| Kilo_Moana_scaffold_5970  | Lau374 | KiloMoana_100059715  | 353            | 69   | SAR324 cluster bacterium SCGC AAA001-C10 (WP_010512894)      |
| Kilo_Moana_scaffold_13444 | Lau3   | KiloMoana_100134454  | 314            | 46   | Azospirillum brasilense (EZQ04064)                           |
| Mariner_scaffold_1440     | Lau20  | Mariner_10014416     | 353            | 90   | SAR324 cluster bacterium SCGC AAA001-C10 (WP_010512894)      |
| Mariner_scaffold_4902     | Lau10  | Mariner_10049034     | 305            | 51   | Uncultured SUP05 bacterium (EEZ80661)                        |
| Mariner_scaffold_5573     | Lau10  | Mariner_10055744     | 302            | 56   | Uncultured SUP05 bacterium (EEZ80661)                        |
| Tahi_Moana_scaffold_736   | Lau113 | TahiMoana_100073715  | 311            | 63   | Methylobacter tundripaludum (WP_006893629)                   |
| Tahi_Moana_scaffold_1020  | Lau51  | TahiMoana_10010213   | 302            | 65   | Uncultured SUP05 bacterium (EEZ80661)                        |
| Tahi_Moana_scaffold_2867  | Lau20  | TahiMoana_10028686   | 341            | 87   | SAR324 cluster bacterium SCGC AAA001-C10 (WP_010512894)      |
| Tahi_Moana_scaffold_6096  | Lau10  | TahiMoana_10060975   | 302            | 86   | Uncultured SUP05 bacterium (EEZ80661)                        |
| Tahi_Moana_scaffold_8493  | Lau10  | TahiMoana_10084944   | 302            | 56   | Uncultured SUP05 bacterium (EEZ80661)                        |
| Tui_Malila_scaffold_128   | #N/A   | TuiMalila_10001299   | 302            | 94   | Uncultured SUP05 bacterium (EEZ80661)                        |
| Tui_Malila_scaffold_216   | Lau20  | TuiMalila_10002171   | 338            | 91   | SAR324 cluster bacterium SCGC AAA001-C10 (WP_010512894)      |
| Tui_Malila_scaffold_476   | Lau20  | TuiMalila_10004772   | 326            | 84   | Deltaproteobacteria bacterium SCGC AAA003-F15 (WP_029734853) |
| Tui_Malila_scaffold_1447  | Lau10  | TuiMalila_100144811  | 305            | 51   | Uncultured SUP05 bacterium (EEZ80661)                        |
| Tui_Malila_scaffold_3360  | Lau15  | TuiMalila_10033616   | 311            | 63   | Sulfurimonas autotrophica (WP_013327894)                     |
| Tui_Malila_scaffold_3455  | Lau10  | TuiMalila_10034565   | 302            | 90   | Uncultured SUP05 bacterium (EEZ80661)                        |



**Supplementary Table S11. Comparison of identified nxrB genes to *Nitrospirae* and *Nitrospinae*.**

| IMG Gene ID         | Scaffold                      | Bin   | Amino Acid % ID to                    |                                  |
|---------------------|-------------------------------|-------|---------------------------------------|----------------------------------|
|                     |                               |       | <i>Candidatus Nitrospira defluvii</i> | <i>Nitrospina</i> sp. AB-629-B18 |
| Abe_100221103       | Abe_scaffold_22109            | #N/A  | 68.5                                  | 99.8                             |
| Abe_100311344       | Abe_scaffold_31133            | #N/A  | 68.4                                  | 98.2                             |
| KiloMoana_100103282 | Kilo_Moana_scaffol<br>d_10327 | #N/A  | 68.5                                  | 99.8                             |
| KiloMoana_100138161 | Kilo_Moana_scaffol<br>d_13815 | #N/A  | 69                                    | 98                               |
| KiloMoana_100171201 | Kilo_Moana_scaffol<br>d_17119 | #N/A  | 69.6                                  | 98                               |
| KiloMoana_100633711 | Kilo_Moana_scaffol<br>d_63370 | #N/A  | 69.5                                  | 98.2                             |
| Mariner_10103292    | Mariner_scaffold_1<br>0328    | #N/A  | 68.8                                  | 97.9                             |
| Mariner_10301911    | Mariner_scaffold_3<br>0190    | #N/A  | 68.5                                  | 99.8                             |
| Mariner_10468281    | Mariner_scaffold_4<br>6827    | #N/A  | 70.5                                  | 98.3                             |
| TahiMoana_10143943  | Tahi_Moana_scaffol<br>d_14393 | #N/A  | 70.1                                  | 98                               |
| TahiMoana_10155273  | Tahi_Moana_scaffol<br>d_15526 | #N/A  | 65.5                                  | 98                               |
| TahiMoana_10220734  | Tahi_Moana_scaffol<br>d_22072 | #N/A  | 63.4                                  | 98.1                             |
| TahiMoana_10614511  | Tahi_Moana_scaffol<br>d_61450 | #N/A  | 70.7                                  | 98.2                             |
| TuiMalila_10045731  | Tui_Malila_scaffold<br>_4572  | Lau41 | 70                                    | 98                               |

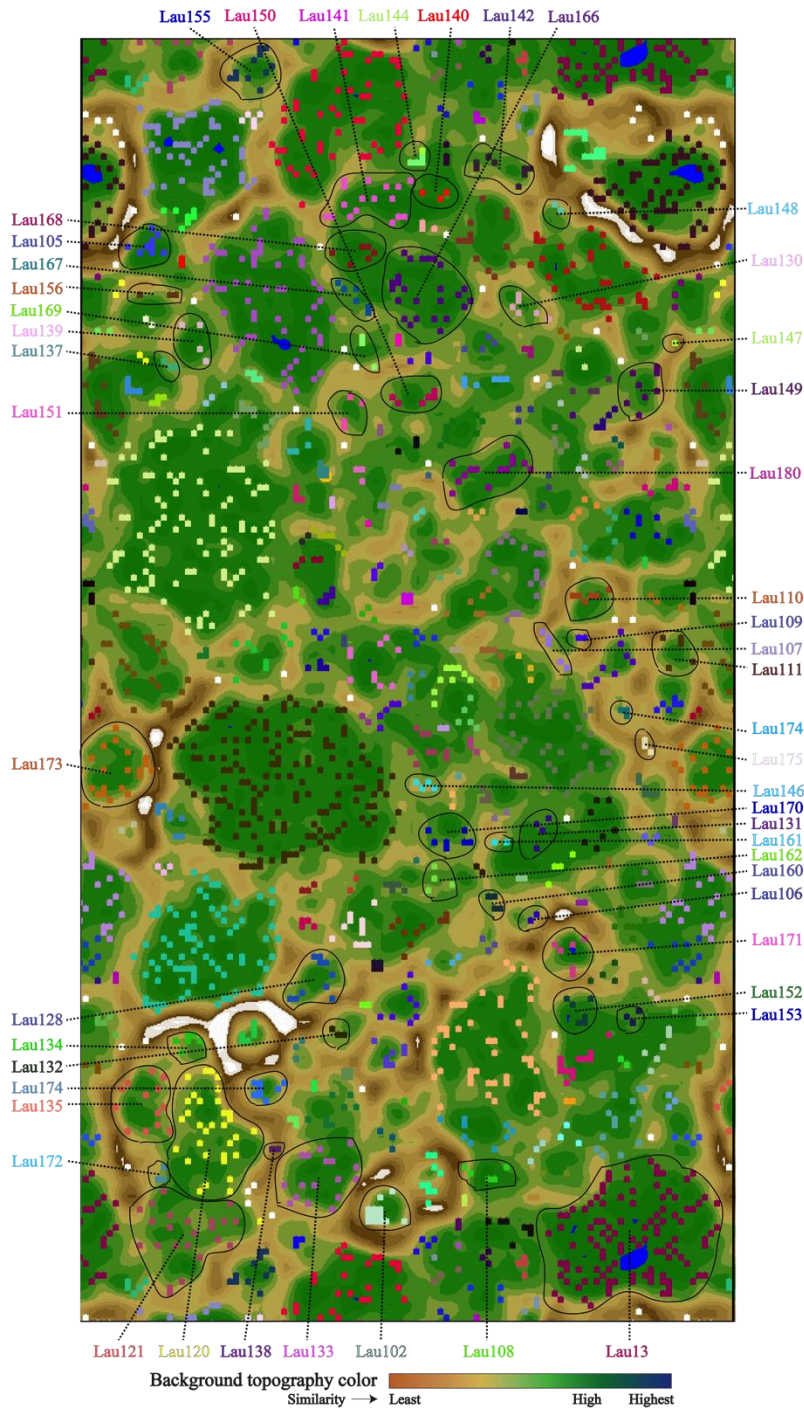

**Fig. S1 Assignment of assembled contigs from ELSC to specific bins containing extrachromosomal elements using ESOM implemented with tetranucleotide frequencies.** Each point on the map represents a contig (>4 kb) or contig fragment generated *in silico* (4-8 kb). All identified bins are indicated by black lines and uniquely color coded as indicated. The ESOM map displayed is tiled and toroidal (i.e., continuous from top to bottom and left to right). Only top 40 bins are shown.

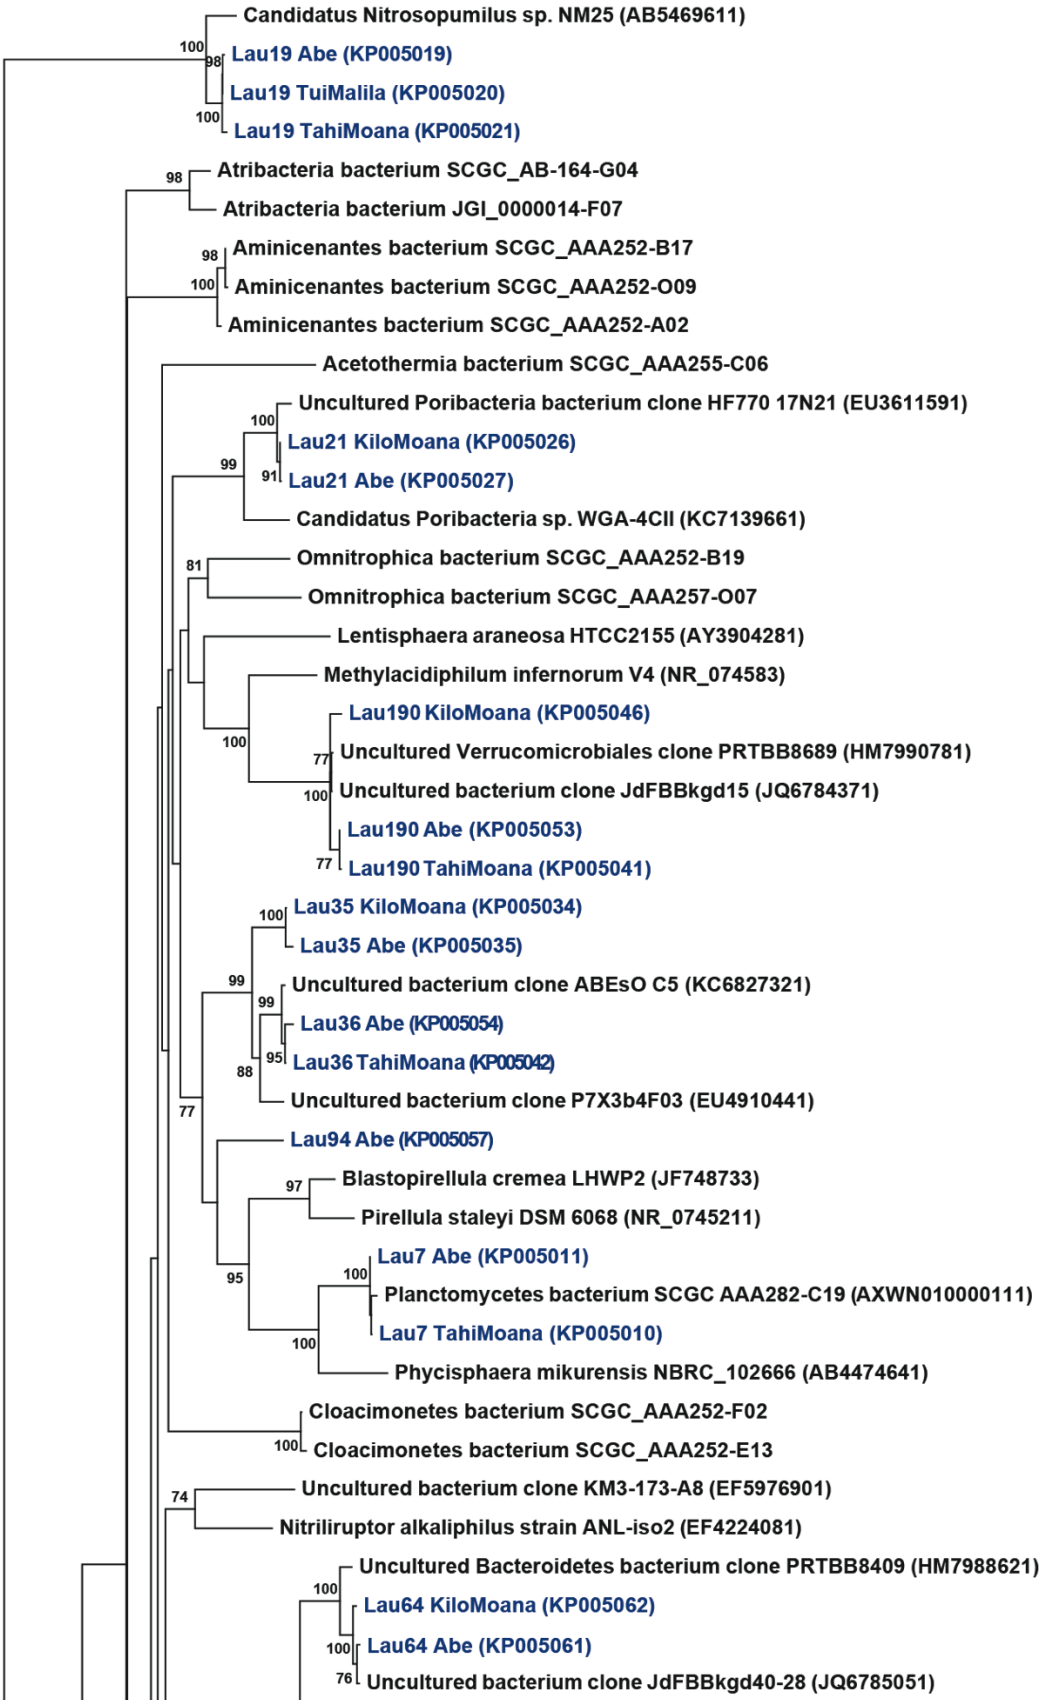

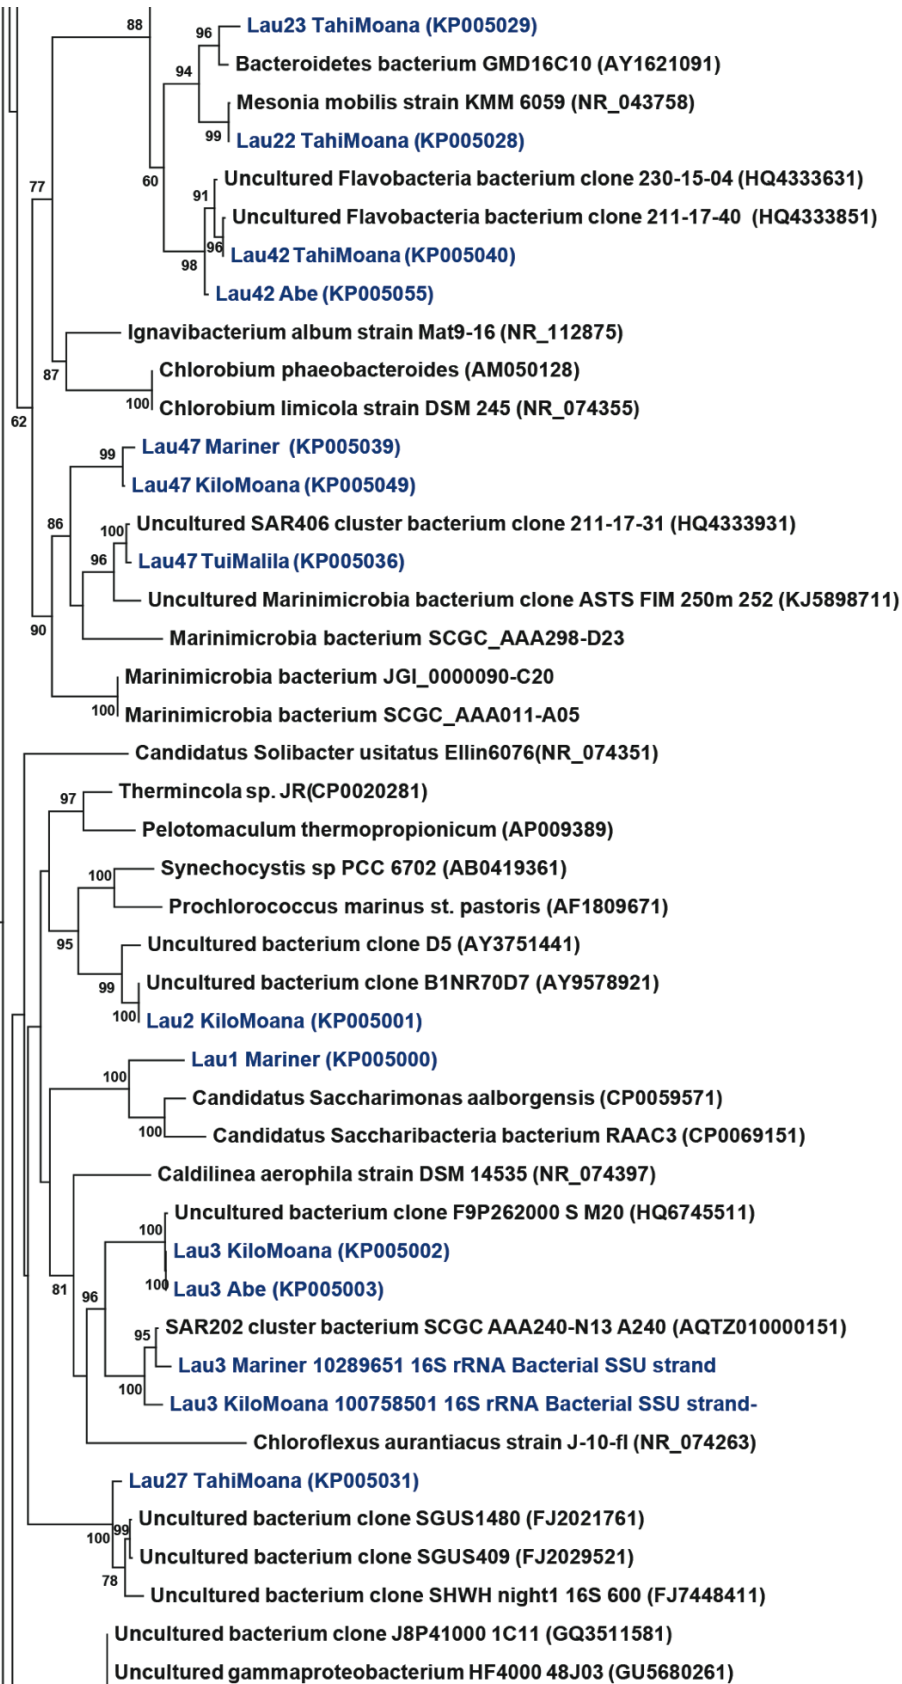

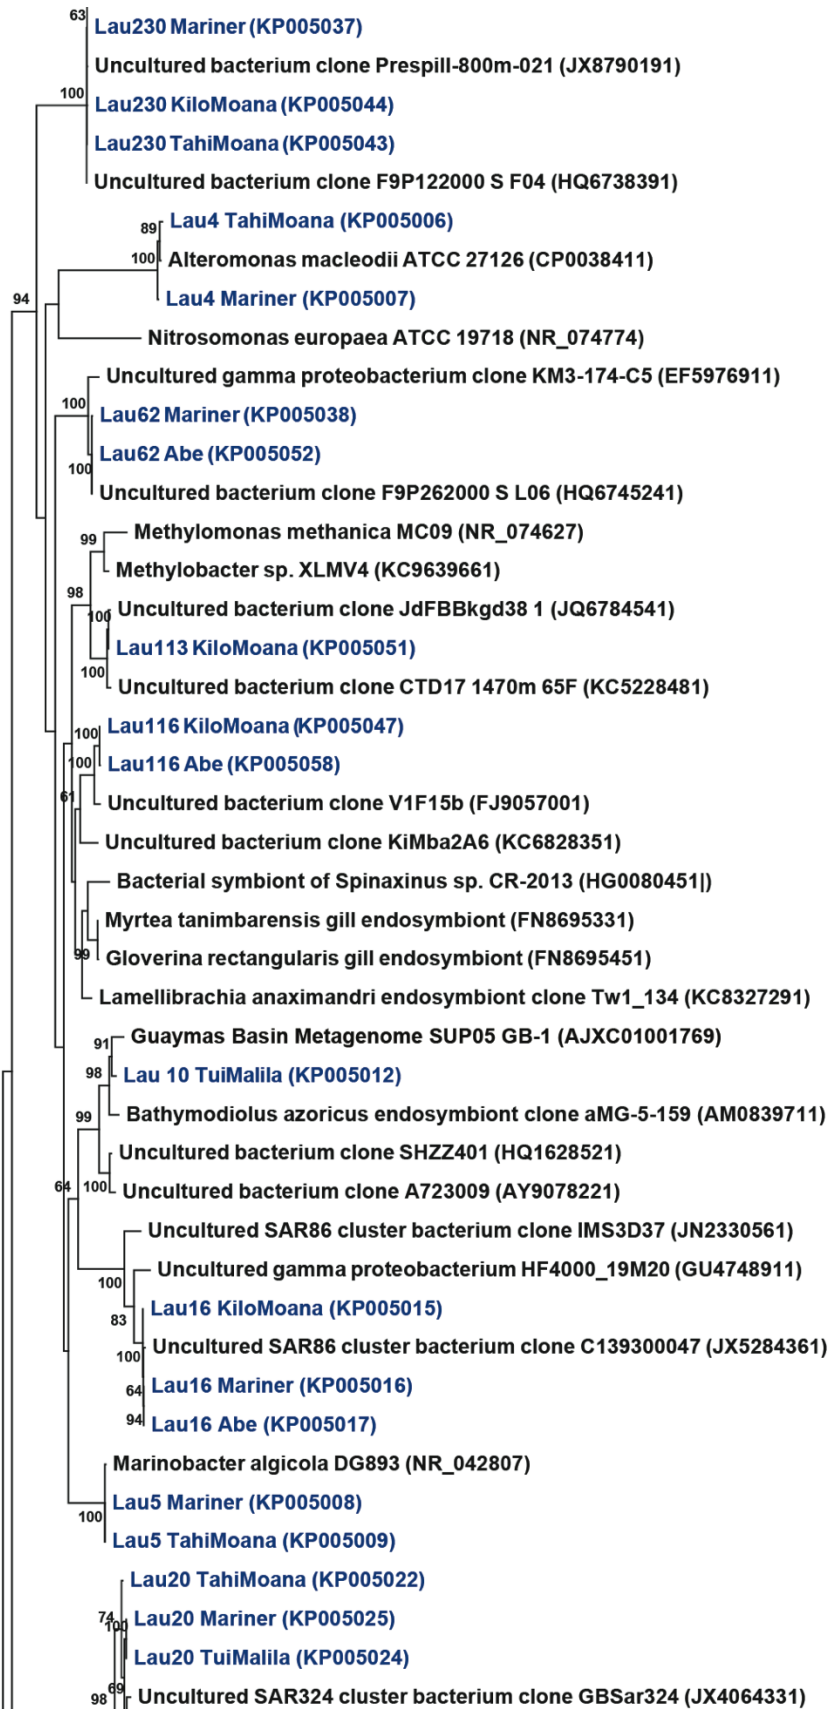

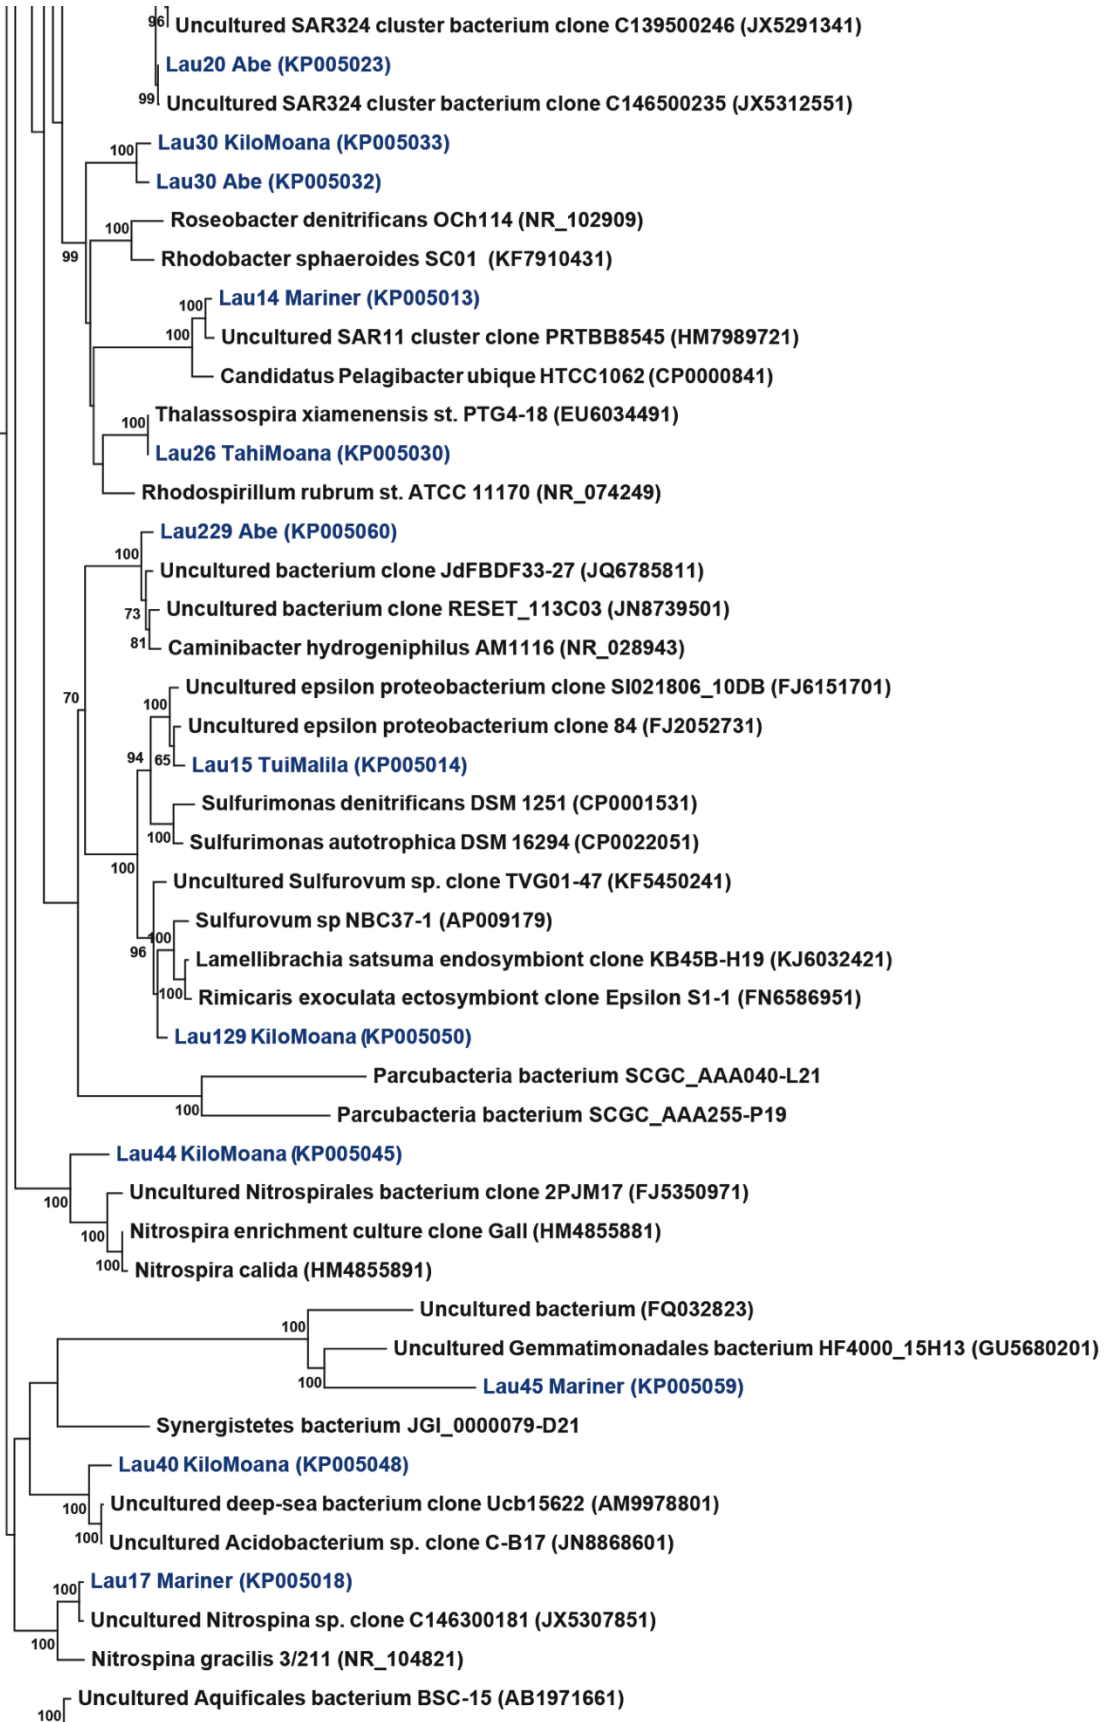

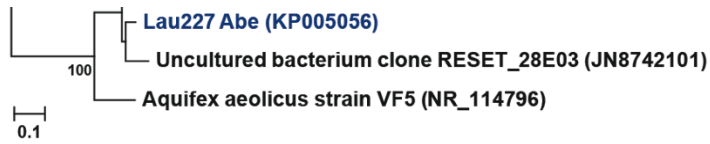

**Fig S2.** Phylogenetic tree of SSU rRNA genes in identified bins inferred by maximum likelihood. All sequences from ELSC are colored blue.

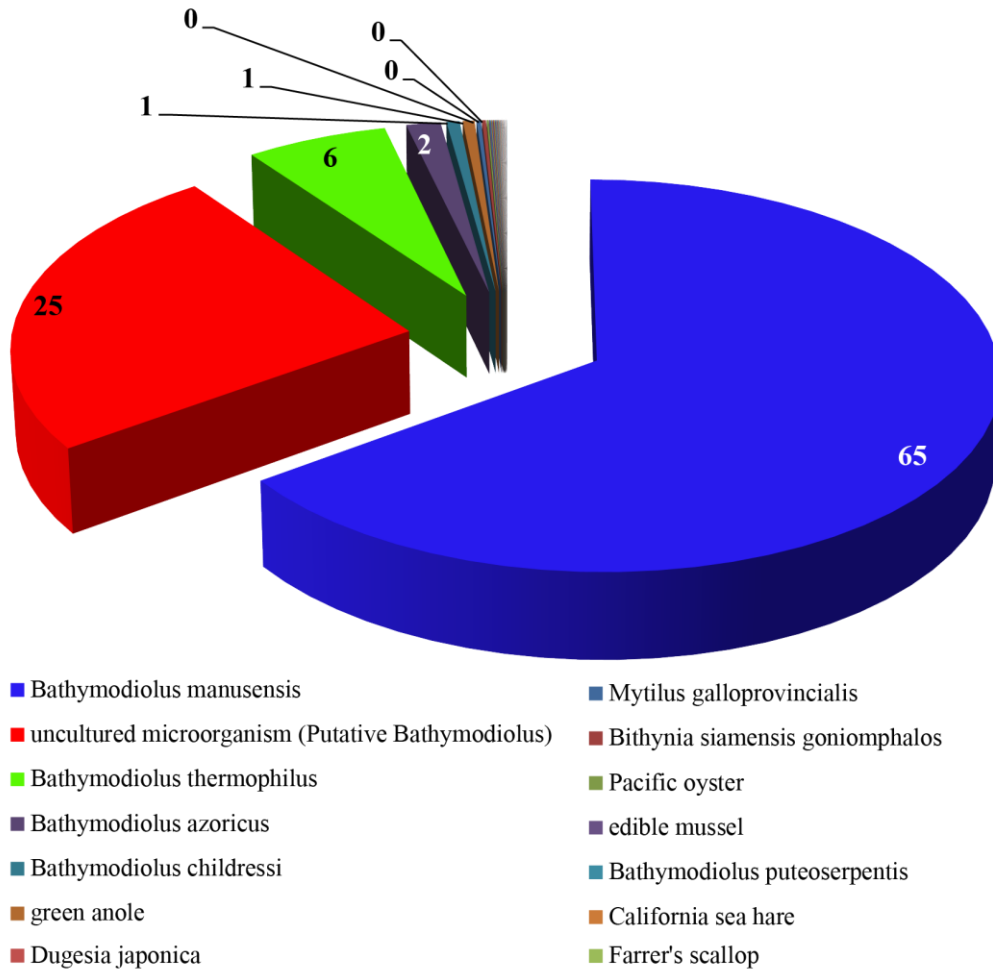

**Fig. S3 Identification of eukaryotic bin “Lau8”.** Pie-chart indicates the distribution of blastn hits of all identified ORFs in bin “Lau8” to organisms in NCBI-nt as indicated in the legend. Inset number indicates the percentage (%) of hits.





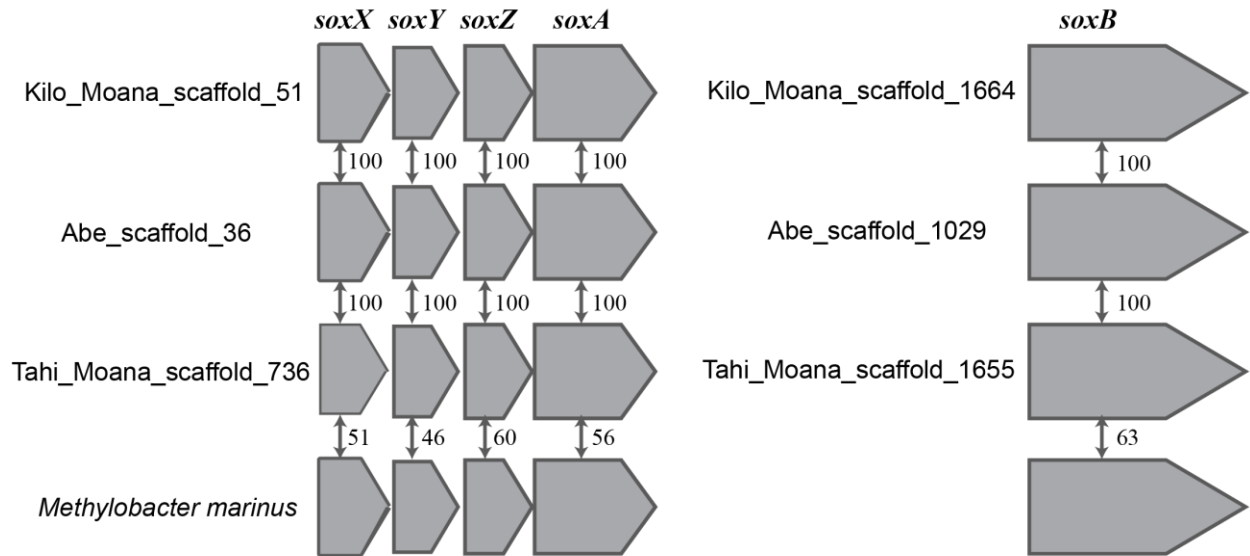

**Fig. S5 Organization of sox genes in Lau113 and comparison with closely related sequences from GenBank.** Arrows indicate shared genes and percent amino acid identity between predicted proteins.

| <b>Bin Name</b> | <b>Organism/Group</b>                                                                                 | <b>CBB</b> | <b>R-TCA</b> | <b>3HP/4HB</b> |
|-----------------|-------------------------------------------------------------------------------------------------------|------------|--------------|----------------|
| Lau10           | <b>Bacteria;Proteobacteria;Gammaproteobacteria;Oceanospirillales;SUP05 Clade</b>                      |            |              |                |
| Lau15           | <b>Bacteria;Proteobacteria;Epsilonproteobacteria;Campylobacterales;Helicobacteraceae;Sulfurimonas</b> |            |              |                |
| Lau16           | <b>Bacteria;Proteobacteria;Gammaproteobacteria;Oceanospirillales;SAR86 clade</b>                      |            |              |                |
| Lau17           | <b>Bacteria; Nitrospinae; Nitrospina; Nitrospinales; Nitrospinaceae</b>                               |            |              |                |
| Lau19           | <b>Archaea;Thaumarchaeota;Marine Group I</b>                                                          |            |              |                |
| Lau20           | <b>Bacteria;Proteobacteria;Deltaproteobacteria;SAR324 clade (Marine Group B)</b>                      |            |              |                |
| Lau35           | <b>Bacteria;Planctomycetes;Pla3 lineage</b>                                                           |            |              |                |
| Lau41           | <b>Bacteria; Nitrospinae; Nitrospina; Nitrospinales; Nitrospinaceae</b>                               |            |              |                |
| Lau60           | <b>Bacteria;Proteobacteria;Gammaproteobacteria;Order Incertae cedis (Tubeworm symbiont)</b>           |            |              |                |
| Lau125          | <b>Archaea;Euryarchaeota;Unclassified</b>                                                             |            |              |                |
| Lau129          | <b>Bacteria;Proteobacteria;Epsilonproteobacteria;Campylobacterales;Helicobacteraceae;Sulfurimonas</b> |            |              |                |
| Lau227          | <b>Bacteria;Aquificae;Aquificae;Aquificales;Aquificaceae</b>                                          |            |              |                |
| Lau229          | <b>Bacteria;Proteobacteria;Epsilonproteobacteria</b>                                                  |            |              |                |
| Lau376          | <b>Bacteria;Proteobacteria;Alphaproteobacteria;Unclassified</b>                                       |            |              |                |

**Fig S6. Identification of carbon fixation pathways in ELSC bins.** Green boxes indicate the presence of the pathways.

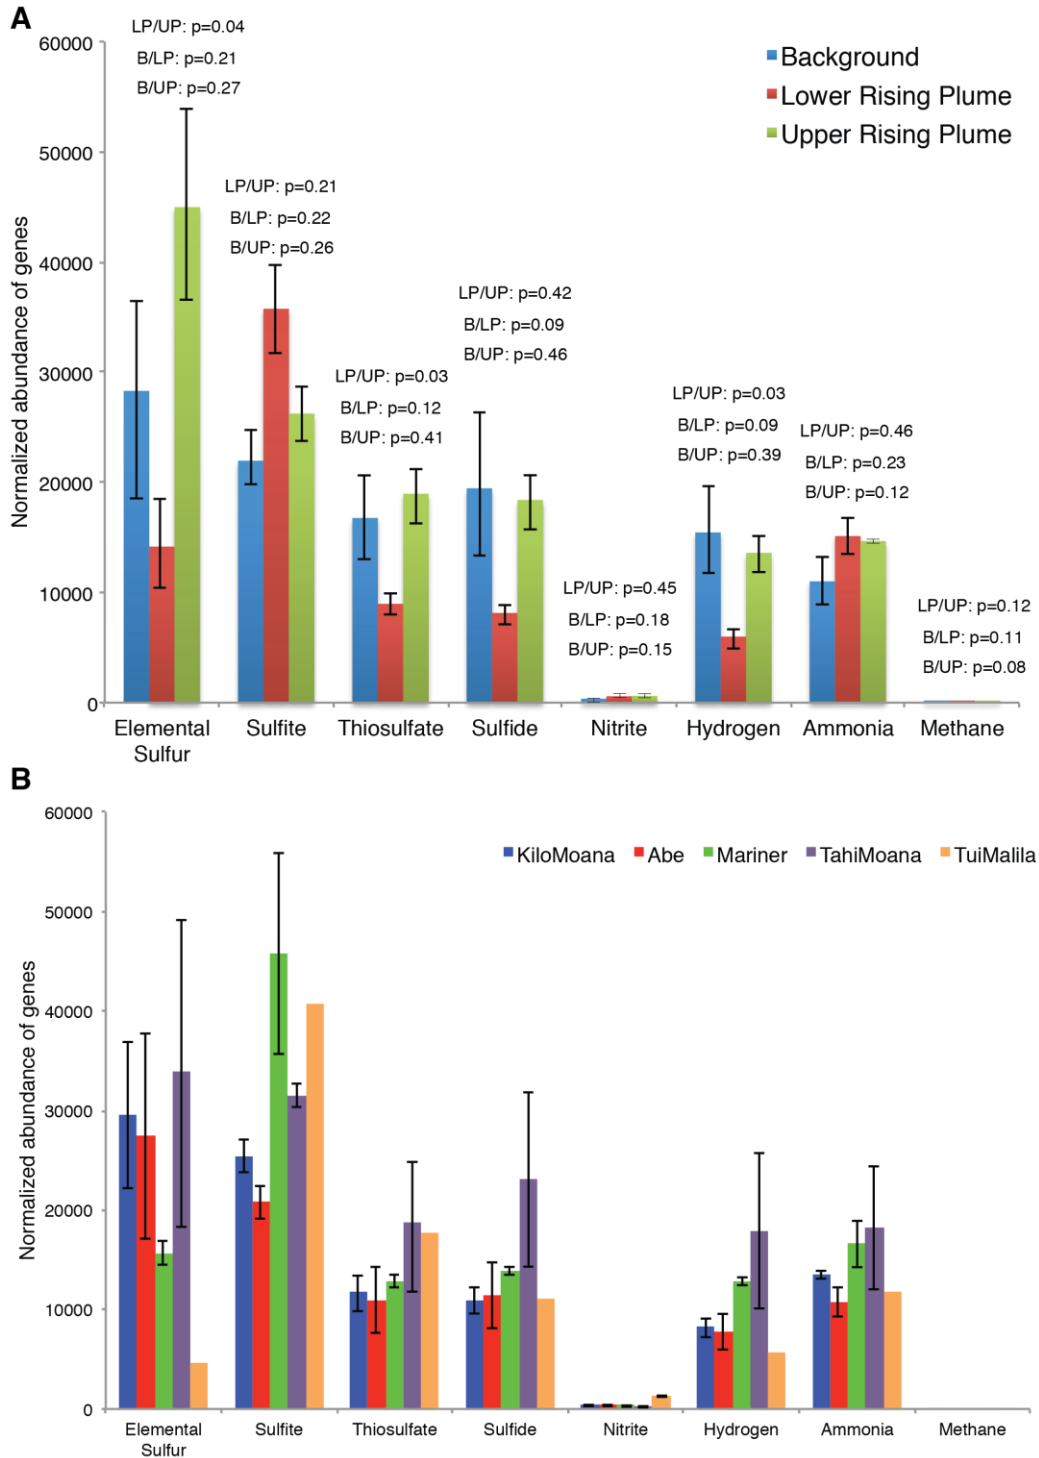

**Figure S7. A:** Normalized abundance of genes associated with electron donors, averaged by sample type. ( $S_0$ –*dsrA*;  $SO_3^{2-}$ –*aprA*;  $S_2O_3^{2-}$ –*soxZ*;  $H_2S$ –*fcc+sqr*,  $H_2$ –*hupL*,  $NO_2^-$ –*nxB*,  $NH_3$ –*amoA*,  $CH_4$ –*pmoA*). Inset p-values were computed by pairwise Student’s t-tests; LP, lower plume, UP; upper plume; B, background. **B:** Normalized abundance of genes associated with electron donors averaged by site. ( $S_0$ –*dsrA*;  $SO_3^{2-}$ –*aprA*;  $S_2O_3^{2-}$ –*soxZ*;  $H_2S$ –*fcc+sqr*,  $H_2$ –*hupL*,  $NO_2^-$ –*nxB*,  $NH_3$ –*amoA*,  $CH_4$ –*pmoA*). Error bars represent the standard error of mean.

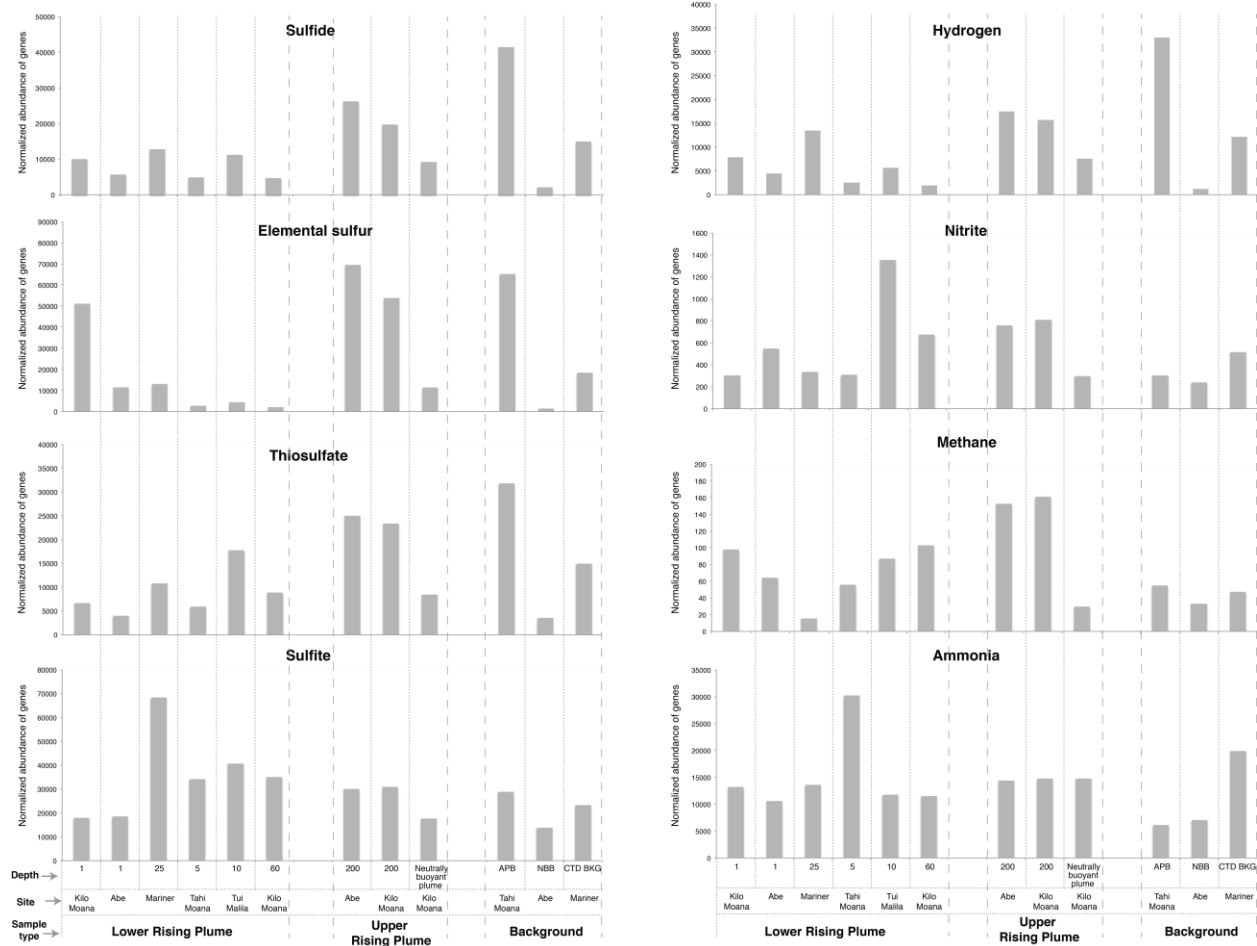

**Figure S8.** Normalized abundance of genes associated with electron donors, arranged by electron donor and sample type. ( $S_0$  - *dsrA*;  $SO_3^{2-}$  - *aprA*;  $S_2O_3^{2-}$  - *soxZ*;  $H_2S$  - *fcc+sqr*,  $H_2$  - *hupL*,  $NO_2^-$  - *nxB*,  $NH_3$  - *amoA*,  $CH_4$  - *pmoA*). Note that the scale is different for each panel.

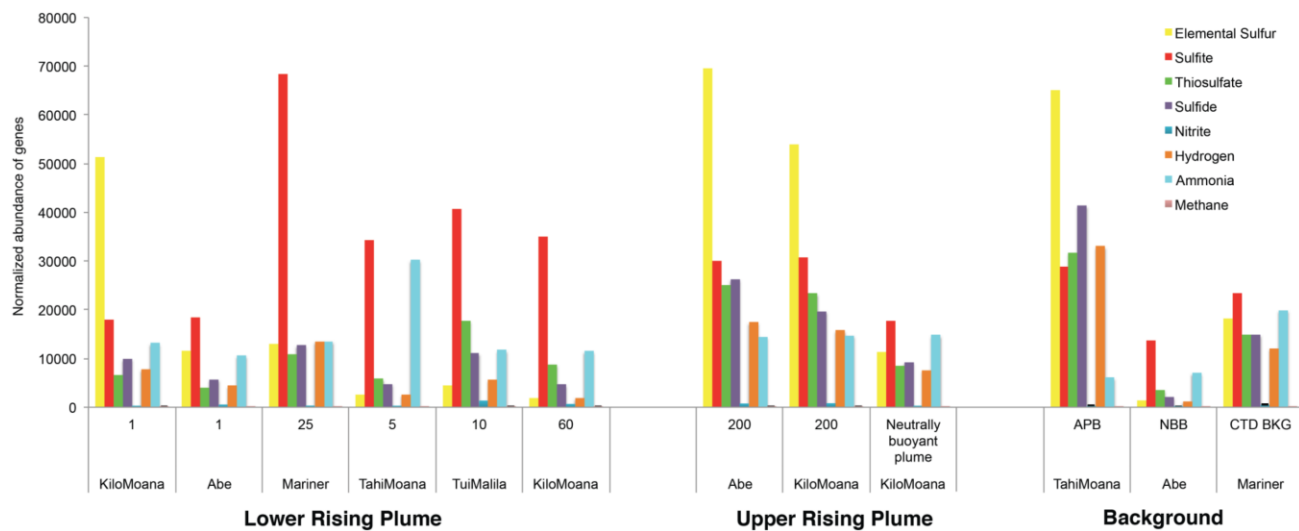

**Figure S9.** Normalized abundance of genes associated with electron donors, arranged by sample type and site. ( $S_0$  – *dsrA*;  $SO_3^{2-}$  – *aprA*;  $S_2O_3^{2-}$  – *soxZ*;  $H_2S$  – *fcc+sqr*,  $H_2$  – *hupL*,  $NO_2^-$  – *nxB*,  $NH_3$  – *amoA*,  $CH_4$  – *pmoA*).

## References

Brandes JA, Boctor NZ, Cody GD, Cooper BA, Hazen RM, Yoder HS (1998). Abiotic nitrogen reduction on the early Earth. *Nature* **395**: 365-367.

Mottl MJ, Seewald JS, Wheat CG, Tivey MK, Michael PJ, Proskurowski G *et al* (2011). Chemistry of hot springs along the Eastern Lau Spreading Center. *Geochimica et Cosmochimica Acta* **75**: 1013-1038.

Seewald J, McCollom T, Proskurowski G, Reeves E, Mottl M, Sharkey J *et al* (2005). Aqueous Volatiles in Lau Basin Hydrothermal Fluids. *EOS Transactions, AGU* **86**: 52.

Sheik CS, Anantharaman K, Breier JA, Sylvan JB, Dick GJ (2014). Spatially resolved sampling reveals dynamic microbial communities in rising hydrothermal plumes across a back-arc basin. *The ISME Journal* **in press**.

Talley LD (ed) (2007) *Hydrographic atlas of the World Ocean Circulation Experiment (WOCE)*. . International WOCE Project Office: Southampton, UK

Von Damm KL, Edmond JM, Measures CI, Grant B (1985). Chemistry of submarine hydrothermal solutions at Guaymas Basin, Gulf of California. *Geochim Cosmochim Acta* **49**: 2221-2237.

Weiss RF, Craig H (1973). Precise shipboard determination of dissolved nitrogen, oxygen, argon, and total inorganic carbon by gas chromatography. *Deep Sea Res Oceanogr Abstr* **20**: 291-303.
